# Supplementary material
Source: MDPI journal article supplement (https://www.mdpi.com/2073-4433/12/5/549)
Supplement: s1 [file s1]

## **Supplementary Information**

### **Ambient levels, emission sources and health effect of PM<sub>2.5</sub>-bound carbonaceous particles and polycyclic aromatic hydrocarbons in the City of Kuala Lumpur, Malaysia**

Hamidah Suradi<sup>1</sup>, Md Firoz Khan<sup>1,2\*</sup>, Nor Asrina Sairi<sup>1</sup>, Haasyimah Ab Rahim<sup>1</sup>, Yusuke Fujii<sup>3</sup>, Qin Kai<sup>2</sup>, Aynul Bari<sup>4</sup>, Murnira Othman<sup>5</sup>, Mohd Talib Latif<sup>6</sup>

<sup>1</sup>Department of Chemistry, Faculty of Science, University of Malaya, 50603 Kuala Lumpur, Malaysia

<sup>2</sup>School of Environment Science and Spatial Informatics, China University of Mining and Technology, Xuzhou, China

<sup>3</sup>Department of Sustainable System Sciences, Graduate School of Humanities and Sustainable System Sciences, Osaka Prefecture University, 1-1 Gakuen-cho, Naka-ku, Sakai, Osaka, 599-8531, Japan

<sup>4</sup>Department of Environmental & Sustainable Engineering, College of Engineering and Applied Sciences, University at Albany, State University of New York, Albany, NY 12222, USA

<sup>5</sup>Institute for Environment and Development (LESTARI), Universiti Kebangsaan Malaysia, 43600 Bangi, Selangor, Malaysia

<sup>6</sup>Department of Earth Sciences and Environment, Faculty of Science and Technology, Universiti Kebangsaan Malaysia, 43600 Bangi, Selangor, Malaysia

\*Corresponding author: [mdfirozkhan@um.edu.my](mailto:mdfirozkhan@um.edu.my); [mdfiroz.khan@gmail.com](mailto:mdfiroz.khan@gmail.com) (MF Khan)

## **1. Synthesis of n-octyl-triethoxysilane functionalized nanoparticles**

N-octyl-triethoxysilane functionalized nanoparticles were prepared to be used in PAHs extraction. Briefly, FeSO<sub>4</sub> and FeCl<sub>3</sub> (molar ratio 2:3) were dissolved in 50 mL of deionized water. magnetic nanoparticles (MNPs) were precipitated by adding 50 mL of ammonium solution (25%) to the mixture of FeSO<sub>4</sub> and FeCl<sub>3</sub> under vigorous stirring. After 30 minutes, the (MNPs) were collected by sedimentation with the help of an external magnetic field and washed with deionized water followed by methanol. The synthesized MNPs were then dried under vacuum at room temperature. The synthesis procedure of MNPs was adopted from Tay, *et al.* [1].

### **1.1 Surface modification of MNPs**

Total of 2 g of the synthesized MNPs, 5 g of n-octyl-triethoxysilane, 0.1 mL of triethylamine, and 25 mL of toluene were swirled for 10 minutes under a nitrogen atmosphere. Then, the mixture was refluxed for 24 hours under a nitrogen atmosphere. Modified magnetic nanoparticles (C<sub>8</sub>MNPs) was collected with the help of an external magnetic field and washed with toluene followed by methanol. Finally, the C<sub>8</sub>MNPs were dried under vacuum at room temperature.

### **1.2 FTIR analysis for MNPs and C<sub>8</sub>MNPs**

Both of modified and unmodified magnetic nanoparticles were analysed using FTIR spectroscopy. FTIR is a technique which the samples are mixed with potassium bromide (KBr) powder as matrix (holder). The sample and KBr powder were grinded together until it become homogenous mixture. Then, thin layer of the mixture was placed into the Manual Hydraulic Press (Specac). The mixture then pressed with pressure 10 ton and hold for 10 seconds. A good pellet is thin and transparent that can allow the infrared beam passes through the pellet. Opaque pellet will give poor spectra because little infrared beam passes through them.

### 1.3 Characterisation of magnetic nanoparticles (MNPs)

The magnetic nanoparticles that had been synthesised was characterised using Fourier-transform infrared spectroscopy (FTIR). After MNPs synthesised, the surface of the MNPs was modified to enhance the stability of MNPs. **Figure S4** shows the spectra of MNPs and C<sub>8</sub>MNPs in the wavelength range of 4000 and 400 cm<sup>-1</sup>. From the spectra, both MNPs and C<sub>8</sub>MNPs has peak at 581 cm<sup>-1</sup> and 3408 cm<sup>-1</sup> indicating Fe-O stretching and O-H stretching vibration respectively. The FTIR spectra for magnetic nanoparticles that has been modified is slightly different from the unmodified magnetic nanoparticles. This is because in modified nanoparticles (C<sub>8</sub>MNPs), there are peaks at 1000 cm<sup>-1</sup> that indicates Si-O bonding and peak at 2924 cm<sup>-1</sup> that represent C-H stretching in n-octyl-triethoxysilane. These peaks are similar with the spectra peaks from a previous study [1].

**Table S1:** Sampling date and flow rate of high-volume sampler for each sampling area

| Sampling Date | Station Name |                                |           |                                |           |                                |
|---------------|--------------|--------------------------------|-----------|--------------------------------|-----------|--------------------------------|
|               | KKKL         |                                | SCA       |                                | DBKL      |                                |
|               | Filter ID    | Flowrate (m <sup>3</sup> /min) | Filter ID | Flowrate (m <sup>3</sup> /min) | Filter ID | Flowrate (m <sup>3</sup> /min) |
| 21/01/2019    | PS2573       | 1.418                          | PS2184    | 1.357                          | PS2649    | 1.189                          |
| 28/01/2019    | PS2575       | 1.416                          | PS2957    | 1.303                          | PS2920    | 1.189                          |
| 03/02/2019    | PS2577       | 1.416                          | PS2932    | 1.246                          | PS2922    | 1.189                          |
| 21/02/2019    | PS2825       | 1.416                          | PS2926    | 1.133                          | PS2906    | 1.189                          |

|            |        |       |        |       |        |       |
|------------|--------|-------|--------|-------|--------|-------|
| 11/03/2019 | PS2831 | 1.416 | PS2846 | 1.189 | PS2913 | 1.189 |
| 17/03/2019 | PS2833 | 1.416 | PS3039 | 1.189 | PS2840 | 1.189 |

**Table S2:** Potential sources of PAHs based on the Diagnostic ratios (DRs)

| Indicator sources | Diagnostic ratios (DRs)       |                               |                                     |                                     |                            |
|-------------------|-------------------------------|-------------------------------|-------------------------------------|-------------------------------------|----------------------------|
|                   | Ant/ Ant + Phe <sup>a,b</sup> | Flt/ Flt + Pyr <sup>a,c</sup> | B[a]A/ B[a]A + Chr <sup>a,d,e</sup> | I[c]P/ I[c]P + B[g]P <sup>a,b</sup> | B[a]P/B[g]P <sup>a,b</sup> |
| Petrogenic        | < 0.1                         | < 0.4                         | < 0.2                               | < 0.2                               | -                          |
| Pyrogenic         | > 0.1                         | > 0.4                         | > 0.35                              | > 0.2                               | -                          |
| Grass, wood, coal | -                             | > 0.5                         | -                                   | > 0.5                               | -                          |
| Diesel            | -                             | -                             | -                                   | 0.35-0.7                            | -                          |
| Oil combustion    | -                             | -                             | -                                   | 0.82                                | -                          |
| Coal              | -                             | -                             | 0.2-0.35                            | -                                   | -                          |
| Wood burning      | -                             | -                             | > 0.5                               | -                                   | -                          |
| Non traffic       | -                             | -                             | -                                   | -                                   | < 0.6                      |
| Traffic           | -                             | -                             | -                                   | -                                   | > 0.6                      |
| This study        | -                             | 0.55 (0.49-0.60)              | 0.58 (0.47-0.81)                    | 0.60                                | 0.82                       |

<sup>a</sup> Yunker, *et al.* [2]

<sup>b</sup> Brändli, *et al.* [3]

<sup>c</sup> De La Torre-Roche, *et al.* [4]

<sup>d</sup> Manoli, *et al.* [5]

<sup>e</sup> Akyüz and Çabuk [6]

**Table S3:** Table of constants value based on group ages.

|    | Unit                | Infant  | Toddler | Children | Adolescent | Adult |
|----|---------------------|---------|---------|----------|------------|-------|
| IR | m <sup>3</sup> /day | 5.4     | 9       | 12       | 15.7       | 15.7  |
| ED | years               | 1       | 5       | 6        | 6          | 24    |
| EF | days/year           | 350     | 350     | 350      | 350        | 350   |
| BW | kg                  | 7       | 15      | 31.2     | 38         | 70    |
| AT | years               | 70*,1** | 70,5    | 70,6     | 70,6       | 70,24 |

\*AT for carcinogens (fixed at 70 years of exposure)

\*\*AT for non-carcinogens (Average years of exposure)

As proposed by EPA [7]

**Table S4:** Value of inhalation unit risk (IUR). (Silvia et al. (2014))

| Compound | IUR<br>( $\mu\text{g m}^{-3}$ ) <sup>-1</sup> | Compound | IUR<br>( $\mu\text{g m}^{-3}$ ) <sup>-1</sup> | Compound | IUR<br>( $\mu\text{g m}^{-3}$ ) <sup>-1</sup> |
|----------|-----------------------------------------------|----------|-----------------------------------------------|----------|-----------------------------------------------|
| Nap      | 3.40E-05                                      | Flt      | 1.10E-06                                      | B[k]F    | 1.10E-04                                      |
| Ace      | 1.10E-06                                      | Pyr      | 1.10E-06                                      | B[a]P    | 1.10E-03                                      |
| Flr      | 1.10E-06                                      | B[a]A    | 1.10E-04                                      | B[h]A    | 1.20E-03                                      |
| Phe      | 1.10E-06                                      | Chr      | 1.10E-05                                      | B[g]P    | 1.10E-05                                      |
| Ant      | 1.10E-05                                      | B[b]F    | 1.10E-04                                      | I[c]P    | 1.10E-04                                      |

**Table S5:** Value of  $R_f D$  for different PAHs compounds

| Compound            | Ace   | Flr   | Ant    | Flt   | Pyr   | B[a]P  | B[g]P <sup>a</sup> |
|---------------------|-------|-------|--------|-------|-------|--------|--------------------|
| $R_f D$ (ng/kg.day) | 60000 | 40000 | 300000 | 40000 | 30000 | 300    | 30000              |
| $R_f D$ (mg/kg.day) | 0.06  | 0.04  | 0.3    | 0.04  | 0.03  | 0.0003 | 0.03               |

<sup>a</sup>  $R_f D$  value proposed by Michigan Department of Environmental Quality (<https://www.michigan.gov/deq>).

Other  $R_f D$  were referred in Integrated Risk Information System of the US EPA (<https://www.epa.gov/iris>).

**Table S6:** Comparison of OC and EC in Malaysia and other Asian countries.

| Study location            | Notes             | OC<br>( $\mu\text{g}/\text{m}^3$ ) | EC<br>( $\mu\text{g}/\text{m}^3$ ) | References |
|---------------------------|-------------------|------------------------------------|------------------------------------|------------|
| Kuala Lumpur,<br>Malaysia | Northeast monsoon | 6.88                               | 3.68                               | This study |

|                          |                    |      |      |                               |
|--------------------------|--------------------|------|------|-------------------------------|
| Bangi Selangor, Malaysia | Hazy condition     | 10.7 | 4.11 | Fujii, <i>et al.</i> [8]      |
| Petaling Jaya, Malaysia  | Northeast monsoon  | 5.2  | 3.4  | Fujii, <i>et al.</i> [9]      |
| Southern Malaysia        | Northeast monsoon  | 2.90 | 1.56 | Suradi, <i>et al.</i> [10]    |
| Bangkok, Thailand        | -                  | 8.03 | 2.62 | ChooChuay, <i>et al.</i> [11] |
| Tianjin, China           | Seasonal variation | 14.1 | 1.6  | Zhou, <i>et al.</i> [12]      |
| Zhejiang, China          |                    | 9.0  | 1.4  |                               |
| Guangdong, China         |                    | 7.0  | 1.2  |                               |
| Sichuan, China           |                    | 13.8 | 1.4  |                               |

**Table S7:** Secondary organic carbon (SOC) concentration for each filter samples.

| Sample ID | (OC/EC) | EC ( $\mu\text{g}/\text{m}^3$ ). | OC ( $\mu\text{g}/\text{m}^3$ ) | SOC ( $\mu\text{g}/\text{m}^3$ ) |
|-----------|---------|----------------------------------|---------------------------------|----------------------------------|
| PS2573    | 1.7674  | 2.1583                           | 3.8146                          | 1.15                             |
| PS2575    | 2.1029  | 1.4855                           | 3.1239                          | 1.29                             |
| PS2184    | 1.8447  | 2.5294                           | 4.6662                          | 1.54                             |
| PS2957    | 1.2813  | 2.8810                           | 3.6914                          | 0.13                             |
| PS2649    | 1.5075  | 3.8892                           | 5.8632                          | 1.06                             |
| PS2920    | 1.2361  | 3.3741                           | 4.1707                          | 0.00                             |
| PS2577    | 3.0416  | 1.3153                           | 4.0006                          | 2.37                             |
| PS2825    | 1.2416  | 3.6620                           | 4.5468                          | 0.02                             |
| PS2932    | 2.2558  | 2.8336                           | 6.3920                          | 2.89                             |
| PS2926    | 1.7999  | 3.2951                           | 5.9309                          | 1.86                             |
| PS2922    | 1.9427  | 2.7635                           | 5.3686                          | 1.95                             |
| PS2906    | 1.6309  | 3.7484                           | 6.1133                          | 1.48                             |
| PS2831    | 1.3882  | 3.4470                           | 4.7850                          | 0.52                             |
| PS2833    | 2.1559  | 4.3287                           | 9.3324                          | 3.98                             |
| PS2846    | 1.3795  | 5.5150                           | 7.6081                          | 0.79                             |
| PS3039    | 3.5283  | 6.8241                           | 24.0773                         | 15.64                            |
| PS2913    | 1.2371  | 5.6195                           | 6.9517                          | 0.01                             |
| PS2840    | 2.0437  | 6.5845                           | 13.4568                         | 5.32                             |

**Table S8:** Water soluble organic carbon (WSOC) measured as TOC, inorganic carbon (IC) and total carbon (TC) concentration ( $\mu\text{g}/\text{m}^3$ )

| Filter ID | TOC $\mu\text{g}/\text{m}^3$ | IC $\mu\text{g}/\text{m}^3$ | TC $\mu\text{g}/\text{m}^3$ |
|-----------|------------------------------|-----------------------------|-----------------------------|
| PS2573    | 1.3879                       | -0.1356                     | 1.2528                      |
| PS2575    | 0.6270                       | -0.1259                     | 0.5021                      |
| PS2577    | 0.9157                       | -0.0255                     | 0.8907                      |
| PS2825    | 2.2656                       | -0.1563                     | 2.1118                      |
| PS2831    | 1.7024                       | -0.1028                     | 1.6011                      |
| PS2833    | 3.6395                       | 0.0118                      | 3.6517                      |
| PS2184    | 1.6968                       | -0.0850                     | 1.6118                      |
| PS2957    | 1.0898                       | -0.0128                     | 1.0792                      |
| PS2932    | 2.4434                       | 0.0338                      | 2.4769                      |
| PS2926    | 1.0886                       | 0.0241                      | 1.1163                      |
| PS2846    | 4.4654                       | -0.1012                     | 4.3636                      |
| PS3039    | 9.1242                       | 0.0220                      | 9.1477                      |
| PS2649    | 3.1480                       | 0.0232                      | 3.1738                      |
| PS2920    | 1.0547                       | 0.1515                      | 1.2070                      |
| PS2922    | 2.1186                       | 0.1041                      | 2.2250                      |
| PS2906    | 2.5702                       | 0.1437                      | 2.7147                      |
| PS2913    | 3.1880                       | -0.1400                     | 3.0480                      |
| PS2840    | 6.5525                       | -0.1744                     | 6.3787                      |

**Table S9:** B[a]P<sub>eq</sub> concentration for each compound and the overall statistics of the B[a]P<sub>eq</sub>.

| Compound              | ng/m <sup>3</sup> |
|-----------------------|-------------------|
| Ace                   | 0.001             |
| Flr                   | 0.002             |
| Ant                   | 0.023             |
| Flt                   | 0.002             |
| Pyr                   | 0.002             |
| B[a]A                 | 0.197             |
| Chr                   | 0.015             |
| B[b]F                 | 0.364             |
| B[k]F                 | 0.187             |
| B[a]P                 | 1.63              |
| I[c]P                 | 0.189             |
| B[h]A                 | 1.20              |
| B[g]P                 | 0.007             |
| Σ B[a]P <sub>eq</sub> | 3.82              |
| Average               | 0.293             |
| Min                   | 0.001             |
| Max                   | 1.62              |



**Table S10:** Statistical Table of lifetime average daily dose (LADD) for cancer risk.

| Group Age | Variable   | Valid<br>N | (mg/kg day)           |                        |                       |                        |
|-----------|------------|------------|-----------------------|------------------------|-----------------------|------------------------|
|           |            |            | Mean                  | Min                    | Max                   | Stdev                  |
| Infant    | Ace        | 3          | $3.46 \times 10^{-9}$ | $4.94 \times 10^{-10}$ | $6.77 \times 10^{-9}$ | $3.15 \times 10^{-9}$  |
|           | Flr        | 8          | $2.19 \times 10^{-9}$ | $3.84 \times 10^{-10}$ | $9.41 \times 10^{-9}$ | $3.22 \times 10^{-9}$  |
|           | Ant        | 10         | $2.46 \times 10^{-9}$ | $7.21 \times 10^{-10}$ | $1.12 \times 10^{-8}$ | $3.36 \times 10^{-9}$  |
|           | Flt        | 10         | $1.70 \times 10^{-9}$ | $4.98 \times 10^{-10}$ | $1.02 \times 10^{-8}$ | $3.02 \times 10^{-9}$  |
|           | Pyr        | 9          | $2.02 \times 10^{-9}$ | $4.28 \times 10^{-10}$ | $9.60 \times 10^{-9}$ | $3.08 \times 10^{-9}$  |
|           | B[a]A      | 5          | $4.16 \times 10^{-9}$ | $1.45 \times 10^{-9}$  | $1.01 \times 10^{-8}$ | $3.44 \times 10^{-9}$  |
|           | Chr        | 7          | $2.19 \times 10^{-9}$ | $1.24 \times 10^{-9}$  | $3.05 \times 10^{-9}$ | $5.92 \times 10^{-10}$ |
|           | B[b]F      | 12         | $3.20 \times 10^{-9}$ | $1.56 \times 10^{-9}$  | $4.01 \times 10^{-9}$ | $7.16 \times 10^{-10}$ |
|           | B[k]F      | 5          | $3.96 \times 10^{-9}$ | $3.02 \times 10^{-9}$  | $4.44 \times 10^{-9}$ | $5.50 \times 10^{-10}$ |
|           | B[a]P      | 4          | $4.29 \times 10^{-9}$ | $2.26 \times 10^{-9}$  | $6.15 \times 10^{-9}$ | $1.60 \times 10^{-9}$  |
|           | I[c]P      | 2          | $1.00 \times 10^{-8}$ | $8.56 \times 10^{-9}$  | $1.14 \times 10^{-8}$ | $2.04 \times 10^{-9}$  |
|           | B[h]A      | 1          | $1.27 \times 10^{-8}$ | $1.27 \times 10^{-8}$  | $1.27 \times 10^{-8}$ | -                      |
|           | B[a]P      | 1          | $7.55 \times 10^{-9}$ | $7.55 \times 10^{-9}$  | $7.55 \times 10^{-9}$ | -                      |
|           | Total PAHs | 13         | $1.84 \times 10^{-8}$ | $1.56 \times 10^{-9}$  | $1.05 \times 10^{-7}$ | $2.83 \times 10^{-8}$  |
| Toddler   | Ace        | 3          | $1.34 \times 10^{-8}$ | $1.92 \times 10^{-9}$  | $2.63 \times 10^{-8}$ | $1.23 \times 10^{-8}$  |
|           | Flr        | 8          | $8.53 \times 10^{-9}$ | $1.49 \times 10^{-9}$  | $3.66 \times 10^{-8}$ | $1.25 \times 10^{-8}$  |
|           | Ant        | 10         | $9.56 \times 10^{-9}$ | $2.80 \times 10^{-9}$  | $4.34 \times 10^{-8}$ | $1.31 \times 10^{-8}$  |
|           | Flt        | 10         | $6.61 \times 10^{-9}$ | $1.94 \times 10^{-9}$  | $3.99 \times 10^{-8}$ | $1.17 \times 10^{-8}$  |
|           | Pyr        | 9          | $7.84 \times 10^{-9}$ | $1.67 \times 10^{-9}$  | $3.73 \times 10^{-8}$ | $1.20 \times 10^{-8}$  |
|           | B[a]A      | 5          | $1.62 \times 10^{-8}$ | $5.63 \times 10^{-9}$  | $3.93 \times 10^{-8}$ | $1.34 \times 10^{-8}$  |
|           | Chr        | 7          | $8.52 \times 10^{-9}$ | $4.83 \times 10^{-9}$  | $1.19 \times 10^{-8}$ | $2.30 \times 10^{-9}$  |
|           | B[b]F      | 12         | $1.25 \times 10^{-8}$ | $6.08 \times 10^{-9}$  | $1.56 \times 10^{-8}$ | $2.78 \times 10^{-9}$  |
|           | B[k]F      | 5          | $1.54 \times 10^{-8}$ | $1.17 \times 10^{-8}$  | $1.73 \times 10^{-8}$ | $2.14 \times 10^{-9}$  |
|           | B[a]P      | 4          | $1.67 \times 10^{-8}$ | $8.77 \times 10^{-9}$  | $2.39 \times 10^{-8}$ | $6.21 \times 10^{-9}$  |
|           | I[c]P      | 2          | $3.89 \times 10^{-8}$ | $3.33 \times 10^{-8}$  | $4.45 \times 10^{-8}$ | $7.92 \times 10^{-9}$  |
|           | B[h]A      | 1          | $4.94 \times 10^{-8}$ | $4.94 \times 10^{-8}$  | $4.94 \times 10^{-8}$ | -                      |
|           | B[g]P      | 1          | $2.94 \times 10^{-8}$ | $2.94 \times 10^{-8}$  | $2.94 \times 10^{-8}$ | -                      |
|           | Total PAHs | 13         | $7.17 \times 10^{-8}$ | $6.08 \times 10^{-9}$  | $4.08 \times 10^{-7}$ | $1.1 \times 10^{-7}$   |
| Children  | Ace        | 3          | $1.03 \times 10^{-8}$ | $1.48 \times 10^{-9}$  | $2.03 \times 10^{-8}$ | $9.44 \times 10^{-9}$  |
|           | Flr        | 8          | $6.56 \times 10^{-9}$ | $1.15 \times 10^{-9}$  | $2.82 \times 10^{-8}$ | $9.62 \times 10^{-9}$  |
|           | Ant        | 10         | $7.36 \times 10^{-9}$ | $2.16 \times 10^{-9}$  | $3.34 \times 10^{-8}$ | $1.01 \times 10^{-8}$  |
|           | Flt        | 10         | $5.09 \times 10^{-9}$ | $1.49 \times 10^{-9}$  | $3.07 \times 10^{-8}$ | $9.03 \times 10^{-9}$  |
|           | Pyr        | 9          | $6.03 \times 10^{-9}$ | $1.28 \times 10^{-9}$  | $2.87 \times 10^{-8}$ | $9.21 \times 10^{-9}$  |
|           | B[a]A      | 5          | $1.24 \times 10^{-8}$ | $4.33 \times 10^{-9}$  | $3.02 \times 10^{-8}$ | $1.03 \times 10^{-8}$  |
|           | Chr        | 7          | $6.55 \times 10^{-9}$ | $3.72 \times 10^{-9}$  | $9.12 \times 10^{-9}$ | $1.77 \times 10^{-9}$  |
|           | B[b]F      | 12         | $9.58 \times 10^{-9}$ | $4.67 \times 10^{-9}$  | $1.20 \times 10^{-8}$ | $2.14 \times 10^{-9}$  |
|           | B[k]F      | 5          | $1.18 \times 10^{-8}$ | $9.02 \times 10^{-9}$  | $1.33 \times 10^{-8}$ | $1.65 \times 10^{-9}$  |
|           | B[a]P      | 4          | $1.28 \times 10^{-8}$ | $6.75 \times 10^{-9}$  | $1.84 \times 10^{-8}$ | $4.78 \times 10^{-9}$  |
|           | I[c]P      | 2          | $2.99 \times 10^{-8}$ | $2.56 \times 10^{-8}$  | $3.42 \times 10^{-8}$ | $6.09 \times 10^{-9}$  |
|           | B[h]A      | 1          | $3.80 \times 10^{-8}$ | $3.80 \times 10^{-8}$  | $3.80 \times 10^{-8}$ | -                      |
|           | B[g]P      | 1          | $2.26 \times 10^{-8}$ | $2.26 \times 10^{-8}$  | $2.26 \times 10^{-8}$ | -                      |
|           | Total PAHs | 13         | $5.51 \times 10^{-8}$ | $4.67 \times 10^{-9}$  | $3.14 \times 10^{-7}$ | $8.47 \times 10^{-8}$  |
|           | Ace        | 3          | $1.11 \times 10^{-8}$ | $1.59 \times 10^{-9}$  | $2.18 \times 10^{-8}$ | $1.01 \times 10^{-8}$  |
|           | Flr        | 8          | $7.05 \times 10^{-9}$ | $1.23 \times 10^{-9}$  | $3.02 \times 10^{-8}$ | $1.03 \times 10^{-8}$  |
|           | Ant        | 10         | $7.90 \times 10^{-9}$ | $2.32 \times 10^{-9}$  | $3.59 \times 10^{-8}$ | $1.08 \times 10^{-8}$  |
|           | Flt        | 10         | $5.46 \times 10^{-9}$ | $1.60 \times 10^{-9}$  | $3.29 \times 10^{-8}$ | $9.70 \times 10^{-9}$  |
|           | Pyr        | 9          | $6.48 \times 10^{-9}$ | $1.38 \times 10^{-9}$  | $3.08 \times 10^{-8}$ | $9.89 \times 10^{-9}$  |
|           | B[a]A      | 5          | $1.34 \times 10^{-8}$ | $4.65 \times 10^{-9}$  | $3.25 \times 10^{-8}$ | $1.11 \times 10^{-8}$  |

|            |            |    |                       |                       |                       |                       |
|------------|------------|----|-----------------------|-----------------------|-----------------------|-----------------------|
| Adolescent | Chr        | 7  | $7.04 \times 10^{-9}$ | $3.99 \times 10^{-9}$ | $9.80 \times 10^{-9}$ | $1.90 \times 10^{-9}$ |
|            | B[b]F      | 12 | $1.03 \times 10^{-8}$ | $5.02 \times 10^{-9}$ | $1.29 \times 10^{-8}$ | $2.30 \times 10^{-9}$ |
|            | B[k]F      | 5  | $1.27 \times 10^{-8}$ | $9.69 \times 10^{-9}$ | $1.43 \times 10^{-8}$ | $1.77 \times 10^{-9}$ |
|            | B[a]P      | 4  | $1.38 \times 10^{-8}$ | $7.25 \times 10^{-9}$ | $1.98 \times 10^{-8}$ | $5.13 \times 10^{-9}$ |
|            | I[c]P      | 2  | $3.21 \times 10^{-8}$ | $2.75 \times 10^{-8}$ | $3.68 \times 10^{-8}$ | $6.55 \times 10^{-9}$ |
|            | B[h]A      | 1  | $4.08 \times 10^{-8}$ | $4.08 \times 10^{-8}$ | $4.08 \times 10^{-8}$ | -                     |
|            | B[g]P      | 1  | $2.43 \times 10^{-8}$ | $2.43 \times 10^{-8}$ | $2.43 \times 10^{-8}$ | -                     |
|            | Total PAHs | 13 | $5.92 \times 10^{-8}$ | $5.02 \times 10^{-9}$ | $3.37 \times 10^{-7}$ | $9.10 \times 10^{-8}$ |
| Adult      | Ace        | 3  | $2.41 \times 10^{-8}$ | $3.45 \times 10^{-9}$ | $4.73 \times 10^{-8}$ | $2.20 \times 10^{-8}$ |
|            | Flr        | 8  | $1.53 \times 10^{-8}$ | $2.68 \times 10^{-9}$ | $6.57 \times 10^{-8}$ | $2.24 \times 10^{-8}$ |
|            | Ant        | 10 | $1.72 \times 10^{-8}$ | $5.03 \times 10^{-9}$ | $7.79 \times 10^{-8}$ | $2.35 \times 10^{-8}$ |
|            | Flt        | 10 | $1.19 \times 10^{-8}$ | $3.48 \times 10^{-9}$ | $7.15 \times 10^{-8}$ | $2.11 \times 10^{-8}$ |
|            | Pyr        | 9  | $1.41 \times 10^{-8}$ | $2.99 \times 10^{-9}$ | $6.70 \times 10^{-8}$ | $2.15 \times 10^{-8}$ |
|            | B[a]A      | 5  | $2.90 \times 10^{-8}$ | $1.01 \times 10^{-8}$ | $7.05 \times 10^{-8}$ | $2.40 \times 10^{-8}$ |
|            | Chr        | 7  | $1.53 \times 10^{-8}$ | $8.67 \times 10^{-9}$ | $2.13 \times 10^{-8}$ | $4.13 \times 10^{-9}$ |
|            | B[b]F      | 12 | $2.24 \times 10^{-8}$ | $1.09 \times 10^{-8}$ | $2.80 \times 10^{-8}$ | $5.00 \times 10^{-9}$ |
|            | B[k]F      | 5  | $2.76 \times 10^{-8}$ | $2.10 \times 10^{-8}$ | $3.10 \times 10^{-8}$ | $3.84 \times 10^{-9}$ |
|            | B[a]P      | 4  | $2.99 \times 10^{-8}$ | $1.57 \times 10^{-8}$ | $4.29 \times 10^{-8}$ | $1.11 \times 10^{-8}$ |
|            | I[c]P      | 2  | $6.98 \times 10^{-8}$ | $5.97 \times 10^{-8}$ | $7.98 \times 10^{-8}$ | $1.42 \times 10^{-8}$ |
|            | B[h]A      | 1  | $8.86 \times 10^{-8}$ | $8.86 \times 10^{-8}$ | $8.86 \times 10^{-8}$ | -                     |
|            | B[g]P      | 1  | $5.27 \times 10^{-8}$ | $5.27 \times 10^{-8}$ | $5.27 \times 10^{-8}$ | -                     |
|            | Total PAHs | 13 | $1.29 \times 10^{-7}$ | $1.09 \times 10^{-8}$ | $7.33 \times 10^{-7}$ | $1.98 \times 10^{-7}$ |

**Table S11:** Statistical table for LADD for every category of group age for non-cancer risk.

| Group Age | Variable   | N  | Mean                  | Min                   | Max                   | Stdev                 |
|-----------|------------|----|-----------------------|-----------------------|-----------------------|-----------------------|
| Infant    | Ace        | 3  | $2.52 \times 10^{-7}$ | $3.61 \times 10^{-8}$ | $4.94 \times 10^{-7}$ | $2.30 \times 10^{-7}$ |
|           | Flr        | 8  | $1.60 \times 10^{-7}$ | $2.80 \times 10^{-8}$ | $6.87 \times 10^{-7}$ | $2.35 \times 10^{-7}$ |
|           | Ant        | 10 | $1.79 \times 10^{-7}$ | $5.26 \times 10^{-8}$ | $8.15 \times 10^{-7}$ | $2.46 \times 10^{-7}$ |
|           | Flt        | 10 | $1.24 \times 10^{-7}$ | $3.64 \times 10^{-8}$ | $7.48 \times 10^{-7}$ | $2.20 \times 10^{-7}$ |
|           | Pyr        | 9  | $1.47 \times 10^{-7}$ | $3.13 \times 10^{-8}$ | $7.01 \times 10^{-7}$ | $2.25 \times 10^{-7}$ |
|           | B[a]A      | 5  | $3.04 \times 10^{-7}$ | $1.06 \times 10^{-7}$ | $7.38 \times 10^{-7}$ | $2.51 \times 10^{-7}$ |
|           | Chr        | 7  | $1.60 \times 10^{-7}$ | $9.07 \times 10^{-8}$ | $2.23 \times 10^{-7}$ | $4.32 \times 10^{-8}$ |
|           | B[b]F      | 12 | $2.34 \times 10^{-7}$ | $1.14 \times 10^{-7}$ | $2.93 \times 10^{-7}$ | $5.23 \times 10^{-8}$ |
|           | B[k]F      | 5  | $2.89 \times 10^{-7}$ | $2.20 \times 10^{-7}$ | $3.24 \times 10^{-7}$ | $4.02 \times 10^{-8}$ |
|           | B[a]P      | 4  | $3.13 \times 10^{-7}$ | $1.65 \times 10^{-7}$ | $4.49 \times 10^{-7}$ | $1.17 \times 10^{-7}$ |
|           | I[c]P      | 2  | $7.30 \times 10^{-7}$ | $6.25 \times 10^{-7}$ | $8.35 \times 10^{-7}$ | $1.49 \times 10^{-7}$ |
|           | B[h]A      | 1  | $9.27 \times 10^{-7}$ | $9.27 \times 10^{-7}$ | $9.27 \times 10^{-7}$ | -                     |
|           | B[g]P      | 1  | $5.51 \times 10^{-7}$ | $5.51 \times 10^{-7}$ | $5.51 \times 10^{-7}$ | -                     |
|           | Total PAHs | 13 | $1.34 \times 10^{-6}$ | $1.14 \times 10^{-7}$ | $7.67 \times 10^{-6}$ | $2.07 \times 10^{-6}$ |
| Toddler   | Ace        | 3  | $1.96 \times 10^{-7}$ | $2.80 \times 10^{-8}$ | $3.85 \times 10^{-7}$ | $1.79 \times 10^{-7}$ |
|           | Flr        | 8  | $1.25 \times 10^{-7}$ | $2.18 \times 10^{-8}$ | $5.34 \times 10^{-7}$ | $1.83 \times 10^{-7}$ |
|           | Ant        | 10 | $1.40 \times 10^{-7}$ | $4.09 \times 10^{-8}$ | $6.34 \times 10^{-7}$ | $1.91 \times 10^{-7}$ |
|           | Flt        | 10 | $9.65 \times 10^{-8}$ | $2.83 \times 10^{-8}$ | $5.82 \times 10^{-7}$ | $1.71 \times 10^{-7}$ |
|           | Pyr        | 9  | $1.14 \times 10^{-7}$ | $2.43 \times 10^{-8}$ | $5.45 \times 10^{-7}$ | $1.75 \times 10^{-7}$ |
|           | B[a]A      | 5  | $2.36 \times 10^{-7}$ | $8.22 \times 10^{-8}$ | $5.74 \times 10^{-7}$ | $1.96 \times 10^{-7}$ |
|           | Chr        | 7  | $1.24 \times 10^{-7}$ | $7.06 \times 10^{-8}$ | $1.73 \times 10^{-7}$ | $3.36 \times 10^{-8}$ |
|           | B[b]F      | 12 | $1.82 \times 10^{-7}$ | $8.87 \times 10^{-8}$ | $2.28 \times 10^{-7}$ | $4.06 \times 10^{-8}$ |
|           | B[k]F      | 5  | $2.25 \times 10^{-7}$ | $1.71 \times 10^{-7}$ | $2.52 \times 10^{-7}$ | $3.12 \times 10^{-8}$ |
|           | B[a]P      | 4  | $2.43 \times 10^{-7}$ | $1.28 \times 10^{-7}$ | $3.49 \times 10^{-7}$ | $9.07 \times 10^{-8}$ |

|            |            |    |                       |                       |                       |                       |
|------------|------------|----|-----------------------|-----------------------|-----------------------|-----------------------|
|            | I[c]P      | 2  | $5.68 \times 10^{-7}$ | $4.86 \times 10^{-7}$ | $6.50 \times 10^{-7}$ | $1.16 \times 10^{-7}$ |
|            | B[h]A      | 1  | $7.21 \times 10^{-7}$ | $7.21 \times 10^{-7}$ | $7.21 \times 10^{-7}$ | -                     |
|            | B[g]P      | 1  | $4.29 \times 10^{-7}$ | $4.29 \times 10^{-7}$ | $4.29 \times 10^{-7}$ | -                     |
|            | Total PAHs | 13 | $1.05 \times 10^{-6}$ | $8.87 \times 10^{-8}$ | $5.96 \times 10^{-6}$ | $1.61 \times 10^{-6}$ |
| Children   | Ace        | 3  | $1.26 \times 10^{-7}$ | $1.80 \times 10^{-8}$ | $2.47 \times 10^{-7}$ | $1.15 \times 10^{-7}$ |
|            | Flr        | 8  | $7.98 \times 10^{-8}$ | $1.40 \times 10^{-8}$ | $3.43 \times 10^{-7}$ | $1.17 \times 10^{-7}$ |
|            | Ant        | 10 | $8.95 \times 10^{-8}$ | $2.62 \times 10^{-8}$ | $4.06 \times 10^{-7}$ | $1.22 \times 10^{-7}$ |
|            | Flt        | 10 | $6.19 \times 10^{-8}$ | $1.81 \times 10^{-8}$ | $3.73 \times 10^{-7}$ | $1.10 \times 10^{-7}$ |
|            | Pyr        | 9  | $7.34 \times 10^{-8}$ | $1.56 \times 10^{-8}$ | $3.49 \times 10^{-7}$ | $1.12 \times 10^{-7}$ |
|            | B[a]A      | 5  | $1.51 \times 10^{-7}$ | $5.27 \times 10^{-8}$ | $3.68 \times 10^{-7}$ | $1.25 \times 10^{-7}$ |
|            | Chr        | 7  | $7.97 \times 10^{-8}$ | $4.52 \times 10^{-8}$ | $1.11 \times 10^{-7}$ | $2.15 \times 10^{-8}$ |
|            | B[b]F      | 12 | $1.17 \times 10^{-7}$ | $5.69 \times 10^{-8}$ | $1.46 \times 10^{-7}$ | $2.61 \times 10^{-8}$ |
|            | B[k]F      | 5  | $1.44 \times 10^{-7}$ | $1.10 \times 10^{-7}$ | $1.62 \times 10^{-7}$ | $2.00 \times 10^{-8}$ |
|            | B[a]P      | 4  | $1.56 \times 10^{-7}$ | $8.21 \times 10^{-8}$ | $2.24 \times 10^{-7}$ | $5.81 \times 10^{-8}$ |
|            | I[c]P      | 2  | $3.64 \times 10^{-7}$ | $3.12 \times 10^{-7}$ | $4.16 \times 10^{-7}$ | $7.41 \times 10^{-8}$ |
|            | B[h]A      | 1  | $4.62 \times 10^{-7}$ | $4.62 \times 10^{-7}$ | $4.62 \times 10^{-7}$ | -                     |
|            | B[g]P      | 1  | $2.75 \times 10^{-7}$ | $2.75 \times 10^{-7}$ | $2.75 \times 10^{-7}$ | -                     |
|            | Total PAHs | 13 | $6.70 \times 10^{-7}$ | $5.69 \times 10^{-8}$ | $3.82 \times 10^{-6}$ | $1.03 \times 10^{-6}$ |
| Adolescent | Ace        | 3  | $1.35 \times 10^{-7}$ | $1.93 \times 10^{-8}$ | $2.65 \times 10^{-7}$ | $1.23 \times 10^{-7}$ |
|            | Flr        | 8  | $8.58 \times 10^{-8}$ | $1.50 \times 10^{-8}$ | $3.68 \times 10^{-7}$ | $1.26 \times 10^{-7}$ |
|            | Ant        | 10 | $9.61 \times 10^{-8}$ | $2.82 \times 10^{-8}$ | $4.36 \times 10^{-7}$ | $1.31 \times 10^{-7}$ |
|            | Flt        | 10 | $6.65 \times 10^{-8}$ | $1.95 \times 10^{-8}$ | $4.01 \times 10^{-7}$ | $1.18 \times 10^{-7}$ |
|            | Pyr        | 9  | $7.88 \times 10^{-8}$ | $1.67 \times 10^{-8}$ | $3.75 \times 10^{-7}$ | $1.20 \times 10^{-7}$ |
|            | B[a]A      | 5  | $1.63 \times 10^{-7}$ | $5.66 \times 10^{-8}$ | $3.95 \times 10^{-7}$ | $1.35 \times 10^{-7}$ |
|            | Chr        | 7  | $8.56 \times 10^{-8}$ | $4.86 \times 10^{-8}$ | $1.19 \times 10^{-7}$ | $2.31 \times 10^{-8}$ |
|            | B[b]F      | 12 | $1.25 \times 10^{-7}$ | $6.11 \times 10^{-8}$ | $1.57 \times 10^{-7}$ | $2.80 \times 10^{-8}$ |
|            | B[k]F      | 5  | $1.55 \times 10^{-7}$ | $1.18 \times 10^{-7}$ | $1.73 \times 10^{-7}$ | $2.15 \times 10^{-8}$ |
|            | B[a]P      | 4  | $1.68 \times 10^{-7}$ | $8.82 \times 10^{-8}$ | $2.41 \times 10^{-7}$ | $6.24 \times 10^{-8}$ |
|            | I[c]P      | 2  | $3.91 \times 10^{-7}$ | $3.35 \times 10^{-7}$ | $4.47 \times 10^{-7}$ | $7.97 \times 10^{-8}$ |
|            | B[h]A      | 1  | $4.96 \times 10^{-7}$ | $4.96 \times 10^{-7}$ | $4.96 \times 10^{-7}$ | -                     |
|            | B[g]P      | 1  | $2.95 \times 10^{-7}$ | $2.95 \times 10^{-7}$ | $2.95 \times 10^{-7}$ | -                     |
|            | Total PAHs | 13 | $7.20 \times 10^{-7}$ | $6.11 \times 10^{-8}$ | $4.11 \times 10^{-6}$ | $1.11 \times 10^{-6}$ |
| Adult      | Ace        | 3  | $7.33 \times 10^{-8}$ | $1.05 \times 10^{-8}$ | $1.44 \times 10^{-7}$ | $6.70 \times 10^{-8}$ |
|            | Flr        | 8  | $4.66 \times 10^{-8}$ | $8.15 \times 10^{-9}$ | $2.00 \times 10^{-7}$ | $6.82 \times 10^{-8}$ |
|            | Ant        | 10 | $5.22 \times 10^{-8}$ | $1.53 \times 10^{-8}$ | $2.37 \times 10^{-7}$ | $7.14 \times 10^{-8}$ |
|            | Flt        | 10 | $3.61 \times 10^{-8}$ | $1.06 \times 10^{-8}$ | $2.18 \times 10^{-7}$ | $6.41 \times 10^{-8}$ |
|            | Pyr        | 9  | $4.28 \times 10^{-8}$ | $9.09 \times 10^{-9}$ | $2.04 \times 10^{-7}$ | $6.53 \times 10^{-8}$ |
|            | B[a]A      | 5  | $8.83 \times 10^{-8}$ | $3.07 \times 10^{-8}$ | $2.15 \times 10^{-7}$ | $7.31 \times 10^{-8}$ |
|            | Chr        | 7  | $4.65 \times 10^{-8}$ | $2.64 \times 10^{-8}$ | $6.47 \times 10^{-8}$ | $1.26 \times 10^{-8}$ |
|            | B[b]F      | 12 | $6.80 \times 10^{-8}$ | $3.32 \times 10^{-8}$ | $8.51 \times 10^{-8}$ | $1.52 \times 10^{-8}$ |
|            | B[k]F      | 5  | $8.40 \times 10^{-8}$ | $6.40 \times 10^{-8}$ | $9.42 \times 10^{-8}$ | $1.17 \times 10^{-8}$ |
|            | B[a]P      | 4  | $9.10 \times 10^{-8}$ | $4.79 \times 10^{-8}$ | $1.31 \times 10^{-7}$ | $3.39 \times 10^{-8}$ |
|            | I[c]P      | 2  | $2.12 \times 10^{-7}$ | $1.82 \times 10^{-7}$ | $2.43 \times 10^{-7}$ | $4.32 \times 10^{-8}$ |
|            | B[h]A      | 1  | $2.69 \times 10^{-7}$ | $2.69 \times 10^{-7}$ | $2.69 \times 10^{-7}$ | -                     |
|            | B[g]P      | 1  | $1.60 \times 10^{-7}$ | $1.60 \times 10^{-7}$ | $1.60 \times 10^{-7}$ | -                     |
|            | Total PAHs | 13 | $3.91 \times 10^{-7}$ | $3.32 \times 10^{-8}$ | $2.23 \times 10^{-6}$ | $6.01 \times 10^{-7}$ |

**Table S12:** Statistical summary for **a)** Overall excess lifetime cancer risk (ELCR) and **b)** ELCR for each sampling site for every category of age group

**a)**

| Group      | Compound | N  | Mean                   | Min                    | Max                    | Std×10v.               |
|------------|----------|----|------------------------|------------------------|------------------------|------------------------|
| Infant     | Ace      | 3  | $4.93 \times 10^{-15}$ | $7.04 \times 10^{-16}$ | $9.66 \times 10^{-15}$ | $4.50 \times 10^{-15}$ |
|            | Flr      | 8  | $3.13 \times 10^{-15}$ | $5.48 \times 10^{-16}$ | $1.34 \times 10^{-14}$ | $4.58 \times 10^{-15}$ |
|            | Ant      | 10 | $3.51 \times 10^{-14}$ | $1.03 \times 10^{-14}$ | $1.59 \times 10^{-13}$ | $4.80 \times 10^{-14}$ |
|            | Flt      | 10 | $2.42 \times 10^{-15}$ | $7.10 \times 10^{-16}$ | $1.46 \times 10^{-14}$ | $4.31 \times 10^{-15}$ |
|            | Pyr      | 9  | $2.87 \times 10^{-15}$ | $6.11 \times 10^{-16}$ | $1.37 \times 10^{-14}$ | $4.39 \times 10^{-15}$ |
|            | B[a]A    | 5  | $5.93 \times 10^{-13}$ | $2.06 \times 10^{-13}$ | $1.44 \times 10^{-12}$ | $4.91 \times 10^{-13}$ |
|            | Chr      | 7  | $3.12 \times 10^{-14}$ | $1.77 \times 10^{-14}$ | $4.35 \times 10^{-14}$ | $8.44 \times 10^{-15}$ |
|            | B[b]F    | 12 | $4.57 \times 10^{-13}$ | $2.23 \times 10^{-13}$ | $5.71 \times 10^{-13}$ | $1.02 \times 10^{-13}$ |
|            | B[k]F    | 5  | $5.65 \times 10^{-13}$ | $4.30 \times 10^{-13}$ | $6.33 \times 10^{-13}$ | $7.85 \times 10^{-14}$ |
|            | B[a]P    | 4  | $6.11 \times 10^{-12}$ | $3.22 \times 10^{-12}$ | $8.78 \times 10^{-12}$ | $2.28 \times 10^{-12}$ |
|            | I[c]P    | 2  | $1.43 \times 10^{-12}$ | $1.22 \times 10^{-12}$ | $1.63 \times 10^{-12}$ | $2.90 \times 10^{-13}$ |
|            | B[h]A    | 1  | $1.97 \times 10^{-11}$ | $1.97 \times 10^{-11}$ | $1.97 \times 10^{-11}$ | -                      |
|            | B[g]P    | 1  | $1.08 \times 10^{-13}$ | $1.08 \times 10^{-13}$ | $1.08 \times 10^{-13}$ | -                      |
| Toddler    | Ace      | 3  | $2.46 \times 10^{-14}$ | $3.52 \times 10^{-15}$ | $4.83 \times 10^{-14}$ | $2.25 \times 10^{-14}$ |
|            | Flr      | 8  | $1.56 \times 10^{-14}$ | $2.74 \times 10^{-15}$ | $6.71 \times 10^{-14}$ | $2.29 \times 10^{-14}$ |
|            | Ant      | 10 | $1.75 \times 10^{-13}$ | $5.14 \times 10^{-14}$ | $7.96 \times 10^{-13}$ | $2.40 \times 10^{-13}$ |
|            | Flt      | 10 | $1.21 \times 10^{-14}$ | $3.55 \times 10^{-15}$ | $7.31 \times 10^{-14}$ | $2.15 \times 10^{-14}$ |
|            | Pyr      | 9  | $1.44 \times 10^{-14}$ | $3.05 \times 10^{-15}$ | $6.84 \times 10^{-14}$ | $2.19 \times 10^{-14}$ |
|            | B[a]A    | 5  | $2.97 \times 10^{-12}$ | $1.03 \times 10^{-12}$ | $7.21 \times 10^{-12}$ | $2.46 \times 10^{-12}$ |
|            | Chr      | 7  | $1.56 \times 10^{-13}$ | $8.86 \times 10^{-14}$ | $2.17 \times 10^{-13}$ | $4.22 \times 10^{-14}$ |
|            | B[b]F    | 12 | $2.28 \times 10^{-12}$ | $1.11 \times 10^{-12}$ | $2.86 \times 10^{-12}$ | $5.10 \times 10^{-13}$ |
|            | B[k]F    | 5  | $2.82 \times 10^{-12}$ | $2.15 \times 10^{-12}$ | $3.16 \times 10^{-12}$ | $3.92 \times 10^{-13}$ |
|            | B[a]P    | 4  | $3.06 \times 10^{-11}$ | $1.61 \times 10^{-11}$ | $4.39 \times 10^{-11}$ | $1.14 \times 10^{-11}$ |
|            | I[c]P    | 2  | $7.13 \times 10^{-12}$ | $6.10 \times 10^{-12}$ | $8.16 \times 10^{-12}$ | $1.45 \times 10^{-12}$ |
|            | B[h]A    | 1  | $9.87 \times 10^{-11}$ | $9.87 \times 10^{-11}$ | $9.87 \times 10^{-11}$ | -                      |
|            | B[g]P    | 1  | $5.38 \times 10^{-13}$ | $5.38 \times 10^{-13}$ | $5.38 \times 10^{-13}$ | -                      |
| Children   | Ace      | 3  | $2.96 \times 10^{-14}$ | $4.23 \times 10^{-15}$ | $5.80 \times 10^{-14}$ | $2.70 \times 10^{-14}$ |
|            | Flr      | 8  | $1.88 \times 10^{-14}$ | $3.29 \times 10^{-15}$ | $8.05 \times 10^{-14}$ | $2.75 \times 10^{-14}$ |
|            | Ant      | 10 | $2.10 \times 10^{-13}$ | $6.17 \times 10^{-14}$ | $9.55 \times 10^{-13}$ | $2.88 \times 10^{-13}$ |
|            | Flt      | 10 | $1.45 \times 10^{-14}$ | $4.26 \times 10^{-15}$ | $8.77 \times 10^{-14}$ | $2.58 \times 10^{-14}$ |
|            | Pyr      | 9  | $1.72 \times 10^{-14}$ | $3.66 \times 10^{-15}$ | $8.21 \times 10^{-14}$ | $2.63 \times 10^{-14}$ |
|            | B[a]A    | 5  | $3.56 \times 10^{-12}$ | $1.24 \times 10^{-12}$ | $8.65 \times 10^{-12}$ | $2.95 \times 10^{-12}$ |
|            | Chr      | 7  | $1.87 \times 10^{-13}$ | $1.06 \times 10^{-13}$ | $2.61 \times 10^{-13}$ | $5.07 \times 10^{-14}$ |
|            | B[b]F    | 12 | $2.74 \times 10^{-12}$ | $1.34 \times 10^{-12}$ | $3.43 \times 10^{-12}$ | $6.12 \times 10^{-13}$ |
|            | B[k]F    | 5  | $3.39 \times 10^{-12}$ | $2.58 \times 10^{-12}$ | $3.80 \times 10^{-12}$ | $4.71 \times 10^{-13}$ |
|            | B[a]P    | 4  | $3.67 \times 10^{-11}$ | $1.93 \times 10^{-11}$ | $5.27 \times 10^{-11}$ | $1.37 \times 10^{-11}$ |
|            | I[c]P    | 2  | $8.56 \times 10^{-12}$ | $7.32 \times 10^{-12}$ | $9.79 \times 10^{-12}$ | $1.74 \times 10^{-12}$ |
|            | B[h]A    | 1  | $1.18 \times 10^{-10}$ | $1.18 \times 10^{-10}$ | $1.18 \times 10^{-10}$ | -                      |
|            | B[g]P    | 1  | $6.46 \times 10^{-13}$ | $6.46 \times 10^{-13}$ | $6.46 \times 10^{-13}$ | -                      |
| Adolescent | Ace      | 3  | $2.96 \times 10^{-14}$ | $4.23 \times 10^{-15}$ | $5.80 \times 10^{-14}$ | $2.70 \times 10^{-14}$ |
|            | Flr      | 8  | $1.88 \times 10^{-14}$ | $3.29 \times 10^{-15}$ | $8.05 \times 10^{-14}$ | $2.75 \times 10^{-14}$ |
|            | Ant      | 10 | $2.10 \times 10^{-13}$ | $6.17 \times 10^{-14}$ | $9.55 \times 10^{-13}$ | $2.88 \times 10^{-13}$ |
|            | Flt      | 10 | $1.45 \times 10^{-14}$ | $4.26 \times 10^{-15}$ | $8.77 \times 10^{-14}$ | $2.58 \times 10^{-14}$ |

|       |       |    |                        |                        |                        |                        |
|-------|-------|----|------------------------|------------------------|------------------------|------------------------|
|       | Pyr   | 9  | $1.72 \times 10^{-14}$ | $3.66 \times 10^{-15}$ | $8.21 \times 10^{-14}$ | $2.63 \times 10^{-14}$ |
|       | B[a]A | 5  | $3.56 \times 10^{-12}$ | $1.24 \times 10^{-12}$ | $8.65 \times 10^{-12}$ | $2.95 \times 10^{-12}$ |
|       | Chr   | 7  | $1.87 \times 10^{-13}$ | $1.06 \times 10^{-13}$ | $2.61 \times 10^{-13}$ | $5.07 \times 10^{-14}$ |
|       | B[b]F | 12 | $2.74 \times 10^{-12}$ | $1.34 \times 10^{-12}$ | $3.43 \times 10^{-12}$ | $6.12 \times 10^{-13}$ |
|       | B[k]F | 5  | $3.39 \times 10^{-12}$ | $2.58 \times 10^{-12}$ | $3.80 \times 10^{-12}$ | $4.71 \times 10^{-13}$ |
|       | B[a]P | 4  | $3.67 \times 10^{-11}$ | $1.93 \times 10^{-11}$ | $5.27 \times 10^{-11}$ | $1.37 \times 10^{-11}$ |
|       | I[c]P | 2  | $8.56 \times 10^{-12}$ | $7.32 \times 10^{-12}$ | $9.79 \times 10^{-12}$ | $1.74 \times 10^{-12}$ |
|       | B[h]A | 1  | $1.18 \times 10^{-10}$ | $1.18 \times 10^{-10}$ | $1.18 \times 10^{-10}$ | -                      |
|       | B[g]P | 1  | $6.46 \times 10^{-13}$ | $6.46 \times 10^{-13}$ | $6.46 \times 10^{-13}$ | -                      |
| Adult | Ace   | 3  | $1.18 \times 10^{-13}$ | $1.69 \times 10^{-14}$ | $2.32 \times 10^{-13}$ | $1.08 \times 10^{-13}$ |
|       | Flr   | 8  | $7.51 \times 10^{-14}$ | $1.31 \times 10^{-14}$ | $3.22 \times 10^{-13}$ | $1.10 \times 10^{-13}$ |
|       | Ant   | 10 | $8.41 \times 10^{-13}$ | $2.47 \times 10^{-13}$ | $3.82 \times 10^{-12}$ | $1.15 \times 10^{-12}$ |
|       | Flt   | 10 | $5.82 \times 10^{-14}$ | $1.70 \times 10^{-14}$ | $3.51 \times 10^{-13}$ | $1.03 \times 10^{-13}$ |
|       | Pyr   | 9  | $6.90 \times 10^{-14}$ | $1.47 \times 10^{-14}$ | $3.28 \times 10^{-13}$ | $1.05 \times 10^{-13}$ |
|       | B[a]A | 5  | $1.42 \times 10^{-11}$ | $4.96 \times 10^{-12}$ | $3.46 \times 10^{-11}$ | $1.18 \times 10^{-11}$ |
|       | Chr   | 7  | $7.49 \times 10^{-13}$ | $4.25 \times 10^{-13}$ | $1.04 \times 10^{-12}$ | $2.03 \times 10^{-13}$ |
|       | B[b]F | 12 | $1.10 \times 10^{-11}$ | $5.35 \times 10^{-12}$ | $1.37 \times 10^{-11}$ | $2.45 \times 10^{-12}$ |
|       | B[k]F | 5  | $1.36 \times 10^{-11}$ | $1.03 \times 10^{-11}$ | $1.52 \times 10^{-11}$ | $1.88 \times 10^{-12}$ |
|       | B[a]P | 4  | $1.47 \times 10^{-10}$ | $7.72 \times 10^{-11}$ | $2.11 \times 10^{-10}$ | $5.46 \times 10^{-11}$ |
|       | I[c]P | 2  | $3.42 \times 10^{-11}$ | $2.93 \times 10^{-11}$ | $3.92 \times 10^{-11}$ | $6.97 \times 10^{-12}$ |
|       | B[h]A | 1  | $4.74 \times 10^{-10}$ | $4.74 \times 10^{-10}$ | $4.74 \times 10^{-10}$ | -                      |
|       | B[g]P | 1  | $2.58 \times 10^{-12}$ | $2.58 \times 10^{-12}$ | $2.58 \times 10^{-12}$ | -                      |

b)

| Group  | Sampling site | PAHs  | N | Mean                   | Min                    | Max                    | Stdev                  |
|--------|---------------|-------|---|------------------------|------------------------|------------------------|------------------------|
| Infant | DBKL          | Flr   | 1 | $9.69 \times 10^{-16}$ | $9.69 \times 10^{-16}$ | $9.69 \times 10^{-16}$ | -                      |
|        |               | Ant   | 2 | $1.75 \times 10^{-14}$ | $1.13 \times 10^{-14}$ | $2.37 \times 10^{-14}$ | $8.82 \times 10^{-15}$ |
|        |               | Flt   | 2 | $1.33 \times 10^{-15}$ | $8.69 \times 10^{-16}$ | $1.80 \times 10^{-15}$ | $6.56 \times 10^{-16}$ |
|        |               | Pyr   | 2 | $9.39 \times 10^{-16}$ | $6.75 \times 10^{-16}$ | $1.20 \times 10^{-15}$ | $3.73 \times 10^{-16}$ |
|        |               | B[a]A | 1 | $3.59 \times 10^{-13}$ | $3.59 \times 10^{-13}$ | $3.59 \times 10^{-13}$ | -                      |
|        |               | Chr   | 1 | $3.64 \times 10^{-14}$ | $3.64 \times 10^{-14}$ | $3.64 \times 10^{-14}$ | -                      |
|        |               | B[b]F | 3 | $5.12 \times 10^{-13}$ | $4.51 \times 10^{-13}$ | $5.71 \times 10^{-13}$ | $6.03 \times 10^{-14}$ |
|        |               | B[k]F | 1 | $6.33 \times 10^{-13}$ | $6.33 \times 10^{-13}$ | $6.33 \times 10^{-13}$ | -                      |
|        | SCA           | Flr   | 2 | $9.29 \times 10^{-16}$ | $7.99 \times 10^{-16}$ | $1.06 \times 10^{-15}$ | $1.84 \times 10^{-16}$ |
|        |               | Ant   | 4 | $1.40 \times 10^{-14}$ | $1.07 \times 10^{-14}$ | $2.32 \times 10^{-14}$ | $6.12 \times 10^{-15}$ |
|        |               | Flt   | 4 | $1.08 \times 10^{-15}$ | $7.23 \times 10^{-16}$ | $1.95 \times 10^{-15}$ | $5.84 \times 10^{-16}$ |
|        |               | Pyr   | 3 | $9.02 \times 10^{-16}$ | $6.30 \times 10^{-16}$ | $1.38 \times 10^{-15}$ | $4.14 \times 10^{-16}$ |
|        |               | B[a]A | 1 | $3.95 \times 10^{-13}$ | $3.95 \times 10^{-13}$ | $3.95 \times 10^{-13}$ | -                      |
|        |               | Chr   | 1 | $3.30 \times 10^{-14}$ | $3.30 \times 10^{-14}$ | $3.30 \times 10^{-14}$ | -                      |
|        |               | B[b]F | 3 | $5.19 \times 10^{-13}$ | $4.77 \times 10^{-13}$ | $5.51 \times 10^{-13}$ | $3.76 \times 10^{-14}$ |
|        |               | B[k]F | 1 | $6.02 \times 10^{-13}$ | $6.02 \times 10^{-13}$ | $6.02 \times 10^{-13}$ | -                      |
|        |               | B[a]P | 1 | $6.08 \times 10^{-12}$ | $6.08 \times 10^{-12}$ | $6.08 \times 10^{-12}$ | -                      |
|        | KKKL          | Ace   | 3 | $4.93 \times 10^{-15}$ | $7.04 \times 10^{-16}$ | $9.66 \times 10^{-15}$ | $4.50 \times 10^{-15}$ |
|        |               | Flr   | 5 | $4.44 \times 10^{-15}$ | $5.48 \times 10^{-16}$ | $1.34 \times 10^{-14}$ | $5.57 \times 10^{-15}$ |
|        |               | Ant   | 4 | $6.49 \times 10^{-14}$ | $1.03 \times 10^{-14}$ | $1.59 \times 10^{-13}$ | $6.97 \times 10^{-14}$ |
|        |               | Flt   | 4 | $4.32 \times 10^{-15}$ | $7.10 \times 10^{-16}$ | $1.46 \times 10^{-14}$ | $6.87 \times 10^{-15}$ |

|          |      |       |   |                        |                        |                        |                        |
|----------|------|-------|---|------------------------|------------------------|------------------------|------------------------|
|          |      | Pyr   | 4 | $5.32 \times 10^{-15}$ | $6.11 \times 10^{-16}$ | $1.37 \times 10^{-14}$ | $6.07 \times 10^{-15}$ |
|          |      | B[a]A | 3 | $7.38 \times 10^{-13}$ | $2.06 \times 10^{-13}$ | $1.44 \times 10^{-12}$ | $6.35 \times 10^{-13}$ |
|          |      | Chr   | 5 | $2.98 \times 10^{-14}$ | $1.77 \times 10^{-14}$ | $4.35 \times 10^{-14}$ | $9.85 \times 10^{-15}$ |
|          |      | B[b]F | 6 | $3.98 \times 10^{-13}$ | $2.23 \times 10^{-13}$ | $5.02 \times 10^{-13}$ | $1.13 \times 10^{-13}$ |
|          |      | B[k]F | 3 | $5.29 \times 10^{-13}$ | $4.30 \times 10^{-13}$ | $5.82 \times 10^{-13}$ | $8.61 \times 10^{-14}$ |
|          |      | B[a]P | 3 | $6.12 \times 10^{-12}$ | $3.22 \times 10^{-12}$ | $8.78 \times 10^{-12}$ | $2.79 \times 10^{-12}$ |
|          |      | I[c]P | 2 | $1.43 \times 10^{-12}$ | $1.22 \times 10^{-12}$ | $1.63 \times 10^{-12}$ | $2.90 \times 10^{-13}$ |
|          |      | B[h]A | 1 | $1.97 \times 10^{-11}$ | $1.97 \times 10^{-11}$ | $1.97 \times 10^{-11}$ | -                      |
|          |      | B[g]P | 1 | $1.08 \times 10^{-13}$ | $1.08 \times 10^{-13}$ | $1.08 \times 10^{-13}$ | -                      |
| Toddler  | DBKL | Flr   | 1 | $4.85 \times 10^{-15}$ | $4.85 \times 10^{-15}$ | $4.85 \times 10^{-15}$ | -                      |
|          |      | Ant   | 2 | $8.75 \times 10^{-14}$ | $5.63 \times 10^{-14}$ | $1.19 \times 10^{-13}$ | $4.41 \times 10^{-14}$ |
|          |      | Flt   | 2 | $6.66 \times 10^{-15}$ | $4.35 \times 10^{-15}$ | $8.98 \times 10^{-15}$ | $3.28 \times 10^{-15}$ |
|          |      | Pyr   | 2 | $4.69 \times 10^{-15}$ | $3.37 \times 10^{-15}$ | $6.01 \times 10^{-15}$ | $1.87 \times 10^{-15}$ |
|          |      | B[a]A | 1 | $1.80 \times 10^{-12}$ | $1.80 \times 10^{-12}$ | $1.80 \times 10^{-12}$ | -                      |
|          |      | Chr   | 1 | $1.82 \times 10^{-13}$ | $1.82 \times 10^{-13}$ | $1.82 \times 10^{-13}$ | -                      |
|          |      | B[b]F | 3 | $2.56 \times 10^{-12}$ | $2.25 \times 10^{-12}$ | $2.86 \times 10^{-12}$ | $3.02 \times 10^{-13}$ |
|          |      | B[k]F | 1 | $3.16 \times 10^{-12}$ | $3.16 \times 10^{-12}$ | $3.16 \times 10^{-12}$ | -                      |
|          | SCA  | Flr   | 2 | $4.65 \times 10^{-15}$ | $4.00 \times 10^{-15}$ | $5.30 \times 10^{-15}$ | $9.19 \times 10^{-16}$ |
|          |      | Ant   | 4 | $7.01 \times 10^{-14}$ | $5.35 \times 10^{-14}$ | $1.16 \times 10^{-13}$ | $3.06 \times 10^{-14}$ |
|          |      | Flt   | 4 | $5.40 \times 10^{-15}$ | $3.61 \times 10^{-15}$ | $9.76 \times 10^{-15}$ | $2.92 \times 10^{-15}$ |
|          |      | Pyr   | 3 | $4.51 \times 10^{-15}$ | $3.15 \times 10^{-15}$ | $6.89 \times 10^{-15}$ | $2.07 \times 10^{-15}$ |
|          |      | B[a]A | 1 | $1.97 \times 10^{-12}$ | $1.97 \times 10^{-12}$ | $1.97 \times 10^{-12}$ | -                      |
|          |      | Chr   | 1 | $1.65 \times 10^{-13}$ | $1.65 \times 10^{-13}$ | $1.65 \times 10^{-13}$ | -                      |
|          |      | B[b]F | 3 | $2.59 \times 10^{-12}$ | $2.39 \times 10^{-12}$ | $2.75 \times 10^{-12}$ | $1.88 \times 10^{-13}$ |
|          |      | B[k]F | 1 | $3.01 \times 10^{-12}$ | $3.01 \times 10^{-12}$ | $3.01 \times 10^{-12}$ | -                      |
|          |      | B[a]P | 1 | $3.04 \times 10^{-11}$ | $3.04 \times 10^{-11}$ | $3.04 \times 10^{-11}$ | -                      |
|          | KKKL | Ace   | 3 | $2.46 \times 10^{-14}$ | $3.52 \times 10^{-15}$ | $4.83 \times 10^{-14}$ | $2.25 \times 10^{-14}$ |
|          |      | Flr   | 5 | $2.22 \times 10^{-14}$ | $2.74 \times 10^{-15}$ | $6.71 \times 10^{-14}$ | $2.79 \times 10^{-14}$ |
|          |      | Ant   | 4 | $3.24 \times 10^{-13}$ | $5.14 \times 10^{-14}$ | $7.96 \times 10^{-13}$ | $3.48 \times 10^{-13}$ |
|          |      | Flt   | 4 | $2.16 \times 10^{-14}$ | $3.55 \times 10^{-15}$ | $7.31 \times 10^{-14}$ | $3.43 \times 10^{-14}$ |
|          |      | Pyr   | 4 | $2.66 \times 10^{-14}$ | $3.05 \times 10^{-15}$ | $6.84 \times 10^{-14}$ | $3.03 \times 10^{-14}$ |
|          |      | B[a]A | 3 | $3.69 \times 10^{-12}$ | $1.03 \times 10^{-12}$ | $7.21 \times 10^{-12}$ | $3.18 \times 10^{-12}$ |
|          |      | Chr   | 5 | $1.49 \times 10^{-13}$ | $8.86 \times 10^{-14}$ | $2.17 \times 10^{-13}$ | $4.92 \times 10^{-14}$ |
|          |      | B[b]F | 6 | $1.99 \times 10^{-12}$ | $1.11 \times 10^{-12}$ | $2.51 \times 10^{-12}$ | $5.63 \times 10^{-13}$ |
|          |      | B[k]F | 3 | $2.65 \times 10^{-12}$ | $2.15 \times 10^{-12}$ | $2.91 \times 10^{-12}$ | $4.30 \times 10^{-13}$ |
|          |      | B[a]P | 3 | $3.06 \times 10^{-11}$ | $1.61 \times 10^{-11}$ | $4.39 \times 10^{-11}$ | $1.39 \times 10^{-11}$ |
|          |      | I[c]P | 2 | $7.13 \times 10^{-12}$ | $6.10 \times 10^{-12}$ | $8.16 \times 10^{-12}$ | $1.45 \times 10^{-12}$ |
|          |      | B[h]A | 1 | $9.87 \times 10^{-11}$ | $9.87 \times 10^{-11}$ | $9.87 \times 10^{-11}$ | -                      |
|          |      | B[g]P | 1 | $5.38 \times 10^{-13}$ | $5.38 \times 10^{-13}$ | $5.38 \times 10^{-13}$ | -                      |
| Children | DBKL | Flr   | 1 | $5.81 \times 10^{-15}$ | $5.81 \times 10^{-15}$ | $5.81 \times 10^{-15}$ | -                      |
|          |      | Ant   | 2 | $1.05 \times 10^{-13}$ | $6.76 \times 10^{-14}$ | $1.42 \times 10^{-13}$ | $5.29 \times 10^{-14}$ |
|          |      | Flt   | 2 | $8.00 \times 10^{-15}$ | $5.21 \times 10^{-15}$ | $1.08 \times 10^{-14}$ | $3.94 \times 10^{-15}$ |
|          |      | Pyr   | 2 | $5.63 \times 10^{-15}$ | $4.05 \times 10^{-15}$ | $7.22 \times 10^{-15}$ | $2.24 \times 10^{-15}$ |
|          |      | B[a]A | 1 | $2.15 \times 10^{-12}$ | $2.15 \times 10^{-12}$ | $2.15 \times 10^{-12}$ | -                      |
|          |      | Chr   | 1 | $2.18 \times 10^{-13}$ | $2.18 \times 10^{-13}$ | $2.18 \times 10^{-13}$ | -                      |
|          |      | B[b]F | 3 | $3.07 \times 10^{-12}$ | $2.70 \times 10^{-12}$ | $3.43 \times 10^{-12}$ | $3.62 \times 10^{-13}$ |
|          |      | B[k]F | 1 | $3.80 \times 10^{-12}$ | $3.80 \times 10^{-12}$ | $3.80 \times 10^{-12}$ | -                      |
|          | SCA  | Flr   | 2 | $5.58 \times 10^{-15}$ | $4.80 \times 10^{-15}$ | $6.36 \times 10^{-15}$ | $1.10 \times 10^{-15}$ |

|            |      |       |   |                        |                        |                        |                        |
|------------|------|-------|---|------------------------|------------------------|------------------------|------------------------|
|            |      | Ant   | 4 | $8.42 \times 10^{-14}$ | $6.42 \times 10^{-14}$ | $1.39 \times 10^{-13}$ | $3.67 \times 10^{-14}$ |
|            |      | Flt   | 4 | $6.48 \times 10^{-15}$ | $4.34 \times 10^{-15}$ | $1.17 \times 10^{-14}$ | $3.50 \times 10^{-15}$ |
|            |      | Pyr   | 3 | $5.41 \times 10^{-15}$ | $3.78 \times 10^{-15}$ | $8.27 \times 10^{-15}$ | $2.48 \times 10^{-15}$ |
|            |      | B[a]A | 1 | $2.37 \times 10^{-12}$ | $2.37 \times 10^{-12}$ | $2.37 \times 10^{-12}$ | -                      |
|            |      | Chr   | 1 | $1.98 \times 10^{-13}$ | $1.98 \times 10^{-13}$ | $1.98 \times 10^{-13}$ | -                      |
|            |      | B[b]F | 3 | $3.11 \times 10^{-12}$ | $2.86 \times 10^{-12}$ | $3.31 \times 10^{-12}$ | $2.26 \times 10^{-13}$ |
|            |      | B[k]F | 1 | $3.61 \times 10^{-12}$ | $3.61 \times 10^{-12}$ | $3.61 \times 10^{-12}$ | -                      |
|            |      | B[a]P | 1 | $3.65 \times 10^{-11}$ | $3.65 \times 10^{-11}$ | $3.65 \times 10^{-11}$ | -                      |
|            | KKKL | Ace   | 3 | $2.96 \times 10^{-14}$ | $4.23 \times 10^{-15}$ | $5.80 \times 10^{-14}$ | $2.70 \times 10^{-14}$ |
|            |      | Flr   | 5 | $2.66 \times 10^{-14}$ | $3.29 \times 10^{-15}$ | $8.05 \times 10^{-14}$ | $3.34 \times 10^{-14}$ |
|            |      | Ant   | 4 | $3.89 \times 10^{-13}$ | $6.17 \times 10^{-14}$ | $9.55 \times 10^{-13}$ | $4.18 \times 10^{-13}$ |
|            |      | Flt   | 4 | $2.59 \times 10^{-14}$ | $4.26 \times 10^{-15}$ | $8.77 \times 10^{-14}$ | $4.12 \times 10^{-14}$ |
|            |      | Pyr   | 4 | $3.19 \times 10^{-14}$ | $3.66 \times 10^{-15}$ | $8.21 \times 10^{-14}$ | $3.64 \times 10^{-14}$ |
|            |      | B[a]A | 3 | $4.43 \times 10^{-12}$ | $1.24 \times 10^{-12}$ | $8.65 \times 10^{-12}$ | $3.81 \times 10^{-12}$ |
|            |      | Chr   | 5 | $1.79 \times 10^{-13}$ | $1.06 \times 10^{-13}$ | $2.61 \times 10^{-13}$ | $5.91 \times 10^{-14}$ |
|            |      | B[b]F | 6 | $2.39 \times 10^{-12}$ | $1.34 \times 10^{-12}$ | $3.01 \times 10^{-12}$ | $6.75 \times 10^{-13}$ |
|            |      | B[k]F | 3 | $3.18 \times 10^{-12}$ | $2.58 \times 10^{-12}$ | $3.49 \times 10^{-12}$ | $5.17 \times 10^{-13}$ |
|            |      | B[a]P | 3 | $3.67 \times 10^{-11}$ | $1.93 \times 10^{-11}$ | $5.27 \times 10^{-11}$ | $1.67 \times 10^{-11}$ |
|            |      | I[c]P | 2 | $8.56 \times 10^{-12}$ | $7.32 \times 10^{-12}$ | $9.79 \times 10^{-12}$ | $1.74 \times 10^{-12}$ |
|            |      | B[h]A | 1 | $1.18 \times 10^{-10}$ | $1.18 \times 10^{-10}$ | $1.18 \times 10^{-10}$ | -                      |
|            |      | B[g]P | 1 | $6.46 \times 10^{-13}$ | $6.46 \times 10^{-13}$ | $6.46 \times 10^{-13}$ | -                      |
| Adolescent | DBKL | Flr   | 1 | $5.81 \times 10^{-15}$ | $5.81 \times 10^{-15}$ | $5.81 \times 10^{-15}$ | -                      |
|            |      | Ant   | 2 | $1.05 \times 10^{-13}$ | $6.76 \times 10^{-14}$ | $1.42 \times 10^{-13}$ | $5.29 \times 10^{-14}$ |
|            |      | Flt   | 2 | $8.00 \times 10^{-15}$ | $5.21 \times 10^{-15}$ | $1.08 \times 10^{-14}$ | $3.94 \times 10^{-15}$ |
|            |      | Pyr   | 2 | $5.63 \times 10^{-15}$ | $4.05 \times 10^{-15}$ | $7.22 \times 10^{-15}$ | $2.24 \times 10^{-15}$ |
|            |      | B[a]A | 1 | $2.15 \times 10^{-12}$ | $2.15 \times 10^{-12}$ | $2.15 \times 10^{-12}$ | -                      |
|            |      | Chr   | 1 | $2.18 \times 10^{-13}$ | $2.18 \times 10^{-13}$ | $2.18 \times 10^{-13}$ | -                      |
|            |      | B[b]F | 3 | $3.07 \times 10^{-12}$ | $2.70 \times 10^{-12}$ | $3.43 \times 10^{-12}$ | $3.62 \times 10^{-13}$ |
|            |      | B[k]F | 1 | $3.80 \times 10^{-12}$ | $3.80 \times 10^{-12}$ | $3.80 \times 10^{-12}$ | -                      |
|            | SCA  | Flr   | 2 | $5.58 \times 10^{-15}$ | $4.80 \times 10^{-15}$ | $6.36 \times 10^{-15}$ | $1.10 \times 10^{-15}$ |
|            |      | Ant   | 4 | $8.42 \times 10^{-14}$ | $6.42 \times 10^{-14}$ | $1.39 \times 10^{-13}$ | $3.67 \times 10^{-14}$ |
|            |      | Flt   | 4 | $6.48 \times 10^{-15}$ | $4.34 \times 10^{-15}$ | $1.17 \times 10^{-14}$ | $3.50 \times 10^{-15}$ |
|            |      | Pyr   | 3 | $5.41 \times 10^{-15}$ | $3.78 \times 10^{-15}$ | $8.27 \times 10^{-15}$ | $2.48 \times 10^{-15}$ |
|            |      | B[a]A | 1 | $2.37 \times 10^{-12}$ | $2.37 \times 10^{-12}$ | $2.37 \times 10^{-12}$ | -                      |
|            |      | Chr   | 1 | $1.98 \times 10^{-13}$ | $1.98 \times 10^{-13}$ | $1.98 \times 10^{-13}$ | -                      |
|            |      | B[b]F | 3 | $3.11 \times 10^{-12}$ | $2.86 \times 10^{-12}$ | $3.31 \times 10^{-12}$ | $2.26 \times 10^{-13}$ |
|            |      | B[k]F | 1 | $3.61 \times 10^{-12}$ | $3.61 \times 10^{-12}$ | $3.61 \times 10^{-12}$ | -                      |
|            |      | B[a]P | 1 | $3.65 \times 10^{-11}$ | $3.65 \times 10^{-11}$ | $3.65 \times 10^{-11}$ | -                      |
|            | KKKL | Ace   | 3 | $2.96 \times 10^{-14}$ | $4.23 \times 10^{-15}$ | $5.80 \times 10^{-14}$ | $2.70 \times 10^{-14}$ |
|            |      | Flr   | 5 | $2.67 \times 10^{-14}$ | $3.29 \times 10^{-15}$ | $8.05 \times 10^{-14}$ | $3.34 \times 10^{-14}$ |
|            |      | Ant   | 4 | $3.90 \times 10^{-13}$ | $6.62 \times 10^{-14}$ | $9.55 \times 10^{-13}$ | $4.17 \times 10^{-13}$ |
|            |      | Flt   | 4 | $2.60 \times 10^{-14}$ | $4.58 \times 10^{-15}$ | $8.77 \times 10^{-14}$ | $4.12 \times 10^{-14}$ |
|            |      | Pyr   | 4 | $3.20 \times 10^{-14}$ | $3.94 \times 10^{-15}$ | $8.21 \times 10^{-14}$ | $3.63 \times 10^{-14}$ |
|            |      | B[a]A | 3 | $4.43 \times 10^{-12}$ | $1.24 \times 10^{-12}$ | $8.65 \times 10^{-12}$ | $3.81 \times 10^{-12}$ |
|            |      | Chr   | 5 | $1.82 \times 10^{-13}$ | $1.06 \times 10^{-13}$ | $2.61 \times 10^{-13}$ | $5.96 \times 10^{-14}$ |
|            |      | B[b]F | 6 | $2.42 \times 10^{-12}$ | $1.34 \times 10^{-12}$ | $3.01 \times 10^{-12}$ | $7.05 \times 10^{-13}$ |
|            |      | B[k]F | 3 | $3.18 \times 10^{-12}$ | $2.58 \times 10^{-12}$ | $3.49 \times 10^{-12}$ | $5.17 \times 10^{-13}$ |
|            |      | B[a]P | 3 | $3.67 \times 10^{-11}$ | $1.93 \times 10^{-11}$ | $5.27 \times 10^{-11}$ | $1.67 \times 10^{-11}$ |

|       |      |       |   |                        |                        |                        |                        |
|-------|------|-------|---|------------------------|------------------------|------------------------|------------------------|
|       |      | I[c]P | 2 | $8.56 \times 10^{-12}$ | $7.32 \times 10^{-12}$ | $9.79 \times 10^{-12}$ | $1.74 \times 10^{-12}$ |
|       |      | B[h]A | 1 | $1.18 \times 10^{-10}$ | $1.18 \times 10^{-10}$ | $1.18 \times 10^{-10}$ | -                      |
|       |      | B[g]P | 1 | $6.46 \times 10^{-13}$ | $6.46 \times 10^{-13}$ | $6.46 \times 10^{-13}$ | -                      |
| Adult | DBKL | Flr   | 1 | $2.33 \times 10^{-14}$ | $2.33 \times 10^{-14}$ | $2.33 \times 10^{-14}$ | -                      |
|       |      | Ant   | 2 | $4.20 \times 10^{-13}$ | $2.70 \times 10^{-13}$ | $5.70 \times 10^{-13}$ | $2.12 \times 10^{-13}$ |
|       |      | Flt   | 2 | $3.20 \times 10^{-14}$ | $2.09 \times 10^{-14}$ | $4.31 \times 10^{-14}$ | $1.57 \times 10^{-14}$ |
|       |      | Pyr   | 2 | $2.25 \times 10^{-14}$ | $1.62 \times 10^{-14}$ | $2.89 \times 10^{-14}$ | $8.96 \times 10^{-15}$ |
|       |      | B[a]A | 1 | $8.62 \times 10^{-12}$ | $8.62 \times 10^{-12}$ | $8.62 \times 10^{-12}$ | -                      |
|       |      | Chr   | 1 | $8.74 \times 10^{-13}$ | $8.74 \times 10^{-13}$ | $8.74 \times 10^{-13}$ | -                      |
|       |      | B[b]F | 3 | $1.23 \times 10^{-11}$ | $1.08 \times 10^{-11}$ | $1.37 \times 10^{-11}$ | $1.45 \times 10^{-12}$ |
|       |      | B[k]F | 1 | $1.52 \times 10^{-11}$ | $1.52 \times 10^{-11}$ | $1.52 \times 10^{-11}$ | -                      |
|       | SCA  | Flr   | 2 | $2.23 \times 10^{-14}$ | $1.92 \times 10^{-14}$ | $2.54 \times 10^{-14}$ | $4.41 \times 10^{-15}$ |
|       |      | Ant   | 4 | $3.37 \times 10^{-13}$ | $2.57 \times 10^{-13}$ | $5.57 \times 10^{-13}$ | $1.47 \times 10^{-13}$ |
|       |      | Flt   | 4 | $2.59 \times 10^{-14}$ | $1.73 \times 10^{-14}$ | $4.69 \times 10^{-14}$ | $1.40 \times 10^{-14}$ |
|       |      | Pyr   | 3 | $2.16 \times 10^{-14}$ | $1.51 \times 10^{-14}$ | $3.31 \times 10^{-14}$ | $9.92 \times 10^{-15}$ |
|       |      | B[a]A | 1 | $9.48 \times 10^{-12}$ | $9.48 \times 10^{-12}$ | $9.48 \times 10^{-12}$ | -                      |
|       |      | Chr   | 1 | $7.92 \times 10^{-13}$ | $7.92 \times 10^{-13}$ | $7.92 \times 10^{-13}$ | -                      |
|       |      | B[b]F | 3 | $1.25 \times 10^{-11}$ | $1.15 \times 10^{-11}$ | $1.32 \times 10^{-11}$ | $9.03 \times 10^{-13}$ |
|       |      | B[k]F | 1 | $1.45 \times 10^{-11}$ | $1.45 \times 10^{-11}$ | $1.45 \times 10^{-11}$ | -                      |
|       |      | B[a]P | 1 | $1.46 \times 10^{-10}$ | $1.46 \times 10^{-10}$ | $1.46 \times 10^{-10}$ | -                      |
|       | KKKL | Ace   | 3 | $1.18 \times 10^{-13}$ | $1.69 \times 10^{-14}$ | $2.32 \times 10^{-13}$ | $1.08 \times 10^{-13}$ |
|       |      | Flr   | 5 | $1.07 \times 10^{-13}$ | $1.31 \times 10^{-14}$ | $3.22 \times 10^{-13}$ | $1.34 \times 10^{-13}$ |
|       |      | Ant   | 4 | $1.56 \times 10^{-12}$ | $2.47 \times 10^{-13}$ | $3.82 \times 10^{-12}$ | $1.67 \times 10^{-12}$ |
|       |      | Flt   | 4 | $1.04 \times 10^{-13}$ | $1.70 \times 10^{-14}$ | $3.51 \times 10^{-13}$ | $1.65 \times 10^{-13}$ |
|       |      | Pyr   | 4 | $1.28 \times 10^{-13}$ | $1.47 \times 10^{-14}$ | $3.28 \times 10^{-13}$ | $1.46 \times 10^{-13}$ |
|       |      | B[a]A | 3 | $1.77 \times 10^{-11}$ | $4.96 \times 10^{-12}$ | $3.46 \times 10^{-11}$ | $1.53 \times 10^{-11}$ |
|       |      | Chr   | 5 | $7.16 \times 10^{-13}$ | $4.25 \times 10^{-13}$ | $1.04 \times 10^{-12}$ | $2.36 \times 10^{-13}$ |
|       |      | B[b]F | 6 | $9.56 \times 10^{-12}$ | $5.35 \times 10^{-12}$ | $1.21 \times 10^{-11}$ | $2.70 \times 10^{-12}$ |
|       |      | B[k]F | 3 | $1.27 \times 10^{-11}$ | $1.03 \times 10^{-11}$ | $1.40 \times 10^{-11}$ | $2.07 \times 10^{-12}$ |
|       |      | B[a]P | 3 | $1.47 \times 10^{-10}$ | $7.72 \times 10^{-11}$ | $2.11 \times 10^{-10}$ | $6.69 \times 10^{-11}$ |
|       |      | I[c]P | 2 | $3.42 \times 10^{-11}$ | $2.93 \times 10^{-11}$ | $3.92 \times 10^{-11}$ | $6.97 \times 10^{-12}$ |
|       |      | B[h]A | 1 | $4.74 \times 10^{-10}$ | $4.74 \times 10^{-10}$ | $4.74 \times 10^{-10}$ | -                      |
|       |      | B[g]P | 1 | $2.58 \times 10^{-12}$ | $2.58 \times 10^{-12}$ | $2.58 \times 10^{-12}$ | -                      |

**Table S13:** Statistical table for **a)** Overall hazard quotient (HQ) and **b)** HQ in each sampling sites for different age group.

**a)**

| Group  | Compound   | N  | Average               | Median                | Min                   | Max                   | Stdev                 |
|--------|------------|----|-----------------------|-----------------------|-----------------------|-----------------------|-----------------------|
| Infant | Ace        | 3  | $4.20 \times 10^{-6}$ | $3.77 \times 10^{-6}$ | $6.01 \times 10^{-7}$ | $8.24 \times 10^{-6}$ | $3.84 \times 10^{-6}$ |
|        | Flr        | 8  | $4.00 \times 10^{-6}$ | $1.30 \times 10^{-6}$ | $7.01 \times 10^{-7}$ | $1.72 \times 10^{-5}$ | $5.87 \times 10^{-6}$ |
|        | Ant        | 10 | $5.98 \times 10^{-7}$ | $2.18 \times 10^{-7}$ | $1.75 \times 10^{-7}$ | $2.72 \times 10^{-6}$ | $8.18 \times 10^{-7}$ |
|        | Flt        | 10 | $3.10 \times 10^{-6}$ | $1.14 \times 10^{-6}$ | $9.09 \times 10^{-7}$ | $1.87 \times 10^{-5}$ | $5.51 \times 10^{-6}$ |
|        | Pyr        | 9  | $4.91 \times 10^{-6}$ | $1.85 \times 10^{-6}$ | $1.04 \times 10^{-6}$ | $2.34 \times 10^{-5}$ | $7.49 \times 10^{-6}$ |
|        | B[a]P      | 4  | $1.04 \times 10^{-3}$ | $1.06 \times 10^{-3}$ | $5.49 \times 10^{-4}$ | $1.50 \times 10^{-3}$ | $3.89 \times 10^{-4}$ |
|        | B[g]P      | 1  | $1.84 \times 10^{-5}$ | $1.84 \times 10^{-5}$ | $1.84 \times 10^{-5}$ | $1.84 \times 10^{-5}$ | -                     |
|        | Total PAHs | 11 | $3.92 \times 10^{-4}$ | $6.00 \times 10^{-6}$ | $1.22 \times 10^{-6}$ | $1.59 \times 10^{-3}$ | $5.87 \times 10^{-4}$ |



|            |            |    |                       |                       |                       |                       |                       |
|------------|------------|----|-----------------------|-----------------------|-----------------------|-----------------------|-----------------------|
| Toddler    | Ace        | 3  | $3.27 \times 10^{-6}$ | $2.93 \times 10^{-6}$ | $4.67 \times 10^{-7}$ | $6.41 \times 10^{-6}$ | $2.99 \times 10^{-6}$ |
|            | Flr        | 8  | $3.11 \times 10^{-6}$ | $1.01 \times 10^{-6}$ | $5.45 \times 10^{-7}$ | $1.34 \times 10^{-5}$ | $4.56 \times 10^{-6}$ |
|            | Ant        | 10 | $4.65 \times 10^{-7}$ | $1.70 \times 10^{-7}$ | $1.36 \times 10^{-7}$ | $2.11 \times 10^{-6}$ | $6.37 \times 10^{-7}$ |
|            | Flt        | 10 | $2.41 \times 10^{-6}$ | $8.83 \times 10^{-7}$ | $7.07 \times 10^{-7}$ | $1.45 \times 10^{-5}$ | $4.29 \times 10^{-6}$ |
|            | Pyr        | 9  | $3.82 \times 10^{-6}$ | $1.44 \times 10^{-6}$ | $8.10 \times 10^{-7}$ | $1.82 \times 10^{-5}$ | $5.82 \times 10^{-6}$ |
|            | B[a]P      | 4  | $8.11 \times 10^{-4}$ | $8.27 \times 10^{-4}$ | $4.27 \times 10^{-4}$ | $1.16 \times 10^{-3}$ | $3.02 \times 10^{-4}$ |
|            | B[g]P      | 1  | $1.43 \times 10^{-5}$ | $1.43 \times 10^{-5}$ | $1.43 \times 10^{-5}$ | $1.43 \times 10^{-5}$ | -                     |
|            | Total PAHs | 11 | $3.05 \times 10^{-4}$ | $4.66 \times 10^{-6}$ | $9.51 \times 10^{-7}$ | $1.23 \times 10^{-3}$ | $4.57 \times 10^{-4}$ |
| Children   | Ace        | 3  | $2.10 \times 10^{-6}$ | $1.88 \times 10^{-6}$ | $3.00 \times 10^{-7}$ | $4.11 \times 10^{-6}$ | $1.91 \times 10^{-6}$ |
|            | Flr        | 8  | $2.00 \times 10^{-6}$ | $6.47 \times 10^{-7}$ | $3.50 \times 10^{-7}$ | $8.56 \times 10^{-6}$ | $2.93 \times 10^{-6}$ |
|            | Ant        | 10 | $2.98 \times 10^{-7}$ | $1.09 \times 10^{-7}$ | $8.74 \times 10^{-8}$ | $1.35 \times 10^{-6}$ | $4.08 \times 10^{-7}$ |
|            | Flt        | 10 | $1.55 \times 10^{-6}$ | $5.66 \times 10^{-7}$ | $4.53 \times 10^{-7}$ | $9.33 \times 10^{-6}$ | $2.75 \times 10^{-6}$ |
|            | Pyr        | 9  | $2.45 \times 10^{-6}$ | $9.23 \times 10^{-7}$ | $5.20 \times 10^{-7}$ | $1.16 \times 10^{-5}$ | $3.73 \times 10^{-6}$ |
|            | B[a]P      | 4  | $5.20 \times 10^{-4}$ | $5.30 \times 10^{-4}$ | $2.74 \times 10^{-4}$ | $7.47 \times 10^{-4}$ | $1.94 \times 10^{-4}$ |
|            | B[g]P      | 1  | $9.16 \times 10^{-6}$ | $9.16 \times 10^{-6}$ | $9.16 \times 10^{-6}$ | $9.16 \times 10^{-6}$ | -                     |
|            | Total PAHs | 11 | $1.96 \times 10^{-4}$ | $2.99 \times 10^{-6}$ | $6.09 \times 10^{-7}$ | $7.91 \times 10^{-4}$ | $2.93 \times 10^{-4}$ |
| Adolescent | Ace        | 3  | $2.25 \times 10^{-6}$ | $2.02 \times 10^{-6}$ | $3.22 \times 10^{-7}$ | $4.41 \times 10^{-6}$ | $2.06 \times 10^{-6}$ |
|            | Flr        | 8  | $2.14 \times 10^{-6}$ | $6.95 \times 10^{-7}$ | $3.75 \times 10^{-7}$ | $9.20 \times 10^{-6}$ | $3.14 \times 10^{-6}$ |
|            | Ant        | 10 | $3.20 \times 10^{-7}$ | $1.17 \times 10^{-7}$ | $9.39 \times 10^{-8}$ | $1.45 \times 10^{-6}$ | $4.38 \times 10^{-7}$ |
|            | Flt        | 10 | $1.66 \times 10^{-6}$ | $6.08 \times 10^{-7}$ | $4.87 \times 10^{-7}$ | $1.00 \times 10^{-5}$ | $2.95 \times 10^{-6}$ |
|            | Pyr        | 9  | $2.63 \times 10^{-6}$ | $9.91 \times 10^{-7}$ | $5.58 \times 10^{-7}$ | $1.25 \times 10^{-5}$ | $4.01 \times 10^{-6}$ |
|            | B[a]P      | 4  | $5.59 \times 10^{-4}$ | $5.69 \times 10^{-4}$ | $2.94 \times 10^{-4}$ | $8.02 \times 10^{-4}$ | $2.08 \times 10^{-4}$ |
|            | B[g]P      | 1  | $9.84 \times 10^{-6}$ | $9.84 \times 10^{-6}$ | $9.84 \times 10^{-6}$ | $9.84 \times 10^{-6}$ | -                     |
|            | Total PAHs | 11 | $2.10 \times 10^{-4}$ | $3.21 \times 10^{-6}$ | $6.55 \times 10^{-7}$ | $8.50 \times 10^{-4}$ | $3.14 \times 10^{-4}$ |
| Adult      | Ace        | 3  | $1.22 \times 10^{-6}$ | $1.10 \times 10^{-6}$ | $1.75 \times 10^{-7}$ | $2.40 \times 10^{-6}$ | $1.12 \times 10^{-6}$ |
|            | Flr        | 8  | $1.16 \times 10^{-6}$ | $3.77 \times 10^{-7}$ | $2.04 \times 10^{-7}$ | $4.99 \times 10^{-6}$ | $1.71 \times 10^{-6}$ |
|            | Ant        | 10 | $1.74 \times 10^{-7}$ | $6.34 \times 10^{-8}$ | $5.10 \times 10^{-8}$ | $7.90 \times 10^{-7}$ | $2.38 \times 10^{-7}$ |
|            | Flt        | 10 | $9.02 \times 10^{-7}$ | $3.30 \times 10^{-7}$ | $2.64 \times 10^{-7}$ | $5.44 \times 10^{-6}$ | $1.60 \times 10^{-6}$ |
|            | Pyr        | 9  | $1.43 \times 10^{-6}$ | $5.38 \times 10^{-7}$ | $3.03 \times 10^{-7}$ | $6.79 \times 10^{-6}$ | $2.18 \times 10^{-6}$ |
|            | B[a]P      | 4  | $3.03 \times 10^{-4}$ | $3.09 \times 10^{-4}$ | $1.60 \times 10^{-4}$ | $4.35 \times 10^{-4}$ | $1.13 \times 10^{-4}$ |
|            | B[g]P      | 1  | $5.34 \times 10^{-6}$ | $5.34 \times 10^{-6}$ | $5.34 \times 10^{-6}$ | $5.34 \times 10^{-6}$ | -                     |
|            | Total PAHs | 11 | $1.14 \times 10^{-4}$ | $1.74 \times 10^{-6}$ | $3.55 \times 10^{-7}$ | $4.61 \times 10^{-4}$ | $1.71 \times 10^{-4}$ |

b)

| Group  | Sampling site | Compound   | N | Mean                  | Min                   | Max                   | Stdev                 |
|--------|---------------|------------|---|-----------------------|-----------------------|-----------------------|-----------------------|
| Infant | DBKL          | Flr        | 1 | $1.24 \times 10^{-6}$ | $1.24 \times 10^{-6}$ | $1.24 \times 10^{-6}$ | -                     |
|        |               | Ant        | 2 | $2.99 \times 10^{-7}$ | $1.92 \times 10^{-7}$ | $4.05 \times 10^{-7}$ | $1.51 \times 10^{-7}$ |
|        |               | Flt        | 2 | $1.71 \times 10^{-6}$ | $1.11 \times 10^{-6}$ | $2.30 \times 10^{-6}$ | $8.39 \times 10^{-7}$ |
|        |               | Pyr        | 2 | $1.60 \times 10^{-6}$ | $1.15 \times 10^{-6}$ | $2.05 \times 10^{-6}$ | $6.37 \times 10^{-7}$ |
|        |               | Total PAHs | 2 | $4.23 \times 10^{-6}$ | $2.46 \times 10^{-6}$ | $6.00 \times 10^{-6}$ | $2.50 \times 10^{-6}$ |
|        | SCA           | Flr        | 2 | $1.19 \times 10^{-6}$ | $1.02 \times 10^{-6}$ | $1.36 \times 10^{-6}$ | $2.35 \times 10^{-7}$ |
|        |               | Ant        | 4 | $2.39 \times 10^{-7}$ | $1.83 \times 10^{-7}$ | $3.96 \times 10^{-7}$ | $1.04 \times 10^{-7}$ |
|        |               | Flt        | 4 | $1.38 \times 10^{-6}$ | $9.25 \times 10^{-7}$ | $2.50 \times 10^{-6}$ | $7.48 \times 10^{-7}$ |
|        |               | Pyr        | 3 | $1.54 \times 10^{-6}$ | $1.08 \times 10^{-6}$ | $2.35 \times 10^{-6}$ | $7.06 \times 10^{-7}$ |
|        |               | B[a]P      | 1 | $1.04 \times 10^{-3}$ | $1.04 \times 10^{-3}$ | $1.04 \times 10^{-3}$ | -                     |
|        |               | Total PAHs | 4 | $2.63 \times 10^{-4}$ | $1.22 \times 10^{-6}$ | $1.04 \times 10^{-3}$ | $5.19 \times 10^{-4}$ |

|            |      |            |   |                       |                       |                       |                       |
|------------|------|------------|---|-----------------------|-----------------------|-----------------------|-----------------------|
|            | KKKL | Ace        | 3 | $4.20 \times 10^{-6}$ | $6.01 \times 10^{-7}$ | $8.24 \times 10^{-6}$ | $3.84 \times 10^{-6}$ |
|            |      | Flr        | 5 | $5.68 \times 10^{-6}$ | $7.01 \times 10^{-7}$ | $1.72 \times 10^{-5}$ | $7.13 \times 10^{-6}$ |
|            |      | Ant        | 4 | $1.11 \times 10^{-6}$ | $1.75 \times 10^{-7}$ | $2.72 \times 10^{-6}$ | $1.19 \times 10^{-6}$ |
|            |      | Flt        | 4 | $5.52 \times 10^{-6}$ | $9.09 \times 10^{-7}$ | $1.87 \times 10^{-5}$ | $8.79 \times 10^{-6}$ |
|            |      | Pyr        | 4 | $9.08 \times 10^{-6}$ | $1.04 \times 10^{-6}$ | $2.34 \times 10^{-5}$ | $1.04 \times 10^{-5}$ |
|            |      | B[a]P      | 3 | $1.05 \times 10^{-3}$ | $5.49 \times 10^{-4}$ | $1.50 \times 10^{-3}$ | $4.76 \times 10^{-4}$ |
|            |      | B[g]P      | 1 | $1.84 \times 10^{-5}$ | $1.84 \times 10^{-5}$ | $1.84 \times 10^{-5}$ | -                     |
|            |      | Total PAHs | 5 | $6.51 \times 10^{-4}$ | $1.86 \times 10^{-6}$ | $1.59 \times 10^{-3}$ | $6.96 \times 10^{-4}$ |
| Toddler    | DBKL | Flr        | 1 | $9.65 \times 10^{-7}$ | $9.65 \times 10^{-7}$ | $9.65 \times 10^{-7}$ | -                     |
|            |      | Ant        | 2 | $2.32 \times 10^{-7}$ | $1.50 \times 10^{-7}$ | $3.15 \times 10^{-7}$ | $1.17 \times 10^{-7}$ |
|            |      | Flt        | 2 | $1.33 \times 10^{-6}$ | $8.65 \times 10^{-7}$ | $1.79 \times 10^{-6}$ | $6.53 \times 10^{-7}$ |
|            |      | Pyr        | 2 | $1.25 \times 10^{-6}$ | $8.96 \times 10^{-7}$ | $1.60 \times 10^{-6}$ | $4.95 \times 10^{-7}$ |
|            |      | Total PAHs | 2 | $3.29 \times 10^{-6}$ | $1.91 \times 10^{-6}$ | $4.66 \times 10^{-6}$ | $1.95 \times 10^{-6}$ |
|            | SCA  | Flr        | 2 | $9.25 \times 10^{-7}$ | $7.96 \times 10^{-7}$ | $1.05 \times 10^{-6}$ | $1.83 \times 10^{-7}$ |
|            |      | Ant        | 4 | $1.86 \times 10^{-7}$ | $1.42 \times 10^{-7}$ | $3.08 \times 10^{-7}$ | $8.12 \times 10^{-8}$ |
|            |      | Flt        | 4 | $1.07 \times 10^{-6}$ | $7.19 \times 10^{-7}$ | $1.94 \times 10^{-6}$ | $5.81 \times 10^{-7}$ |
|            |      | Pyr        | 3 | $1.20 \times 10^{-6}$ | $8.37 \times 10^{-7}$ | $1.83 \times 10^{-6}$ | $5.49 \times 10^{-7}$ |
|            |      | B[a]P      | 1 | $8.07 \times 10^{-4}$ | $8.07 \times 10^{-4}$ | $8.07 \times 10^{-4}$ | -                     |
|            |      | Total PAHs | 4 | $2.04 \times 10^{-4}$ | $9.51 \times 10^{-7}$ | $8.09 \times 10^{-4}$ | $4.03 \times 10^{-4}$ |
|            | KKKL | Ace        | 3 | $3.27 \times 10^{-6}$ | $4.67 \times 10^{-7}$ | $6.41 \times 10^{-6}$ | $2.99 \times 10^{-6}$ |
|            |      | Flr        | 5 | $4.42 \times 10^{-6}$ | $5.45 \times 10^{-7}$ | $1.34 \times 10^{-5}$ | $5.55 \times 10^{-6}$ |
|            |      | Ant        | 4 | $8.61 \times 10^{-7}$ | $1.36 \times 10^{-7}$ | $2.11 \times 10^{-6}$ | $9.25 \times 10^{-7}$ |
|            |      | Flt        | 4 | $4.30 \times 10^{-6}$ | $7.07 \times 10^{-7}$ | $1.45 \times 10^{-5}$ | $6.84 \times 10^{-6}$ |
|            |      | Pyr        | 4 | $7.06 \times 10^{-6}$ | $8.10 \times 10^{-7}$ | $1.82 \times 10^{-5}$ | $8.05 \times 10^{-6}$ |
|            |      | B[a]P      | 3 | $8.13 \times 10^{-4}$ | $4.27 \times 10^{-4}$ | $1.16 \times 10^{-3}$ | $3.70 \times 10^{-4}$ |
|            |      | B[g]P      | 1 | $1.43 \times 10^{-5}$ | $1.43 \times 10^{-5}$ | $1.43 \times 10^{-5}$ | -                     |
|            |      | Total PAHs | 5 | $5.07 \times 10^{-4}$ | $1.45 \times 10^{-6}$ | $1.23 \times 10^{-3}$ | $5.41 \times 10^{-4}$ |
| Children   | DBKL | Flr        | 1 | $6.18 \times 10^{-7}$ | $6.18 \times 10^{-7}$ | $6.18 \times 10^{-7}$ | -                     |
|            |      | Ant        | 2 | $1.49 \times 10^{-7}$ | $9.59 \times 10^{-8}$ | $2.02 \times 10^{-7}$ | $7.51 \times 10^{-8}$ |
|            |      | Flt        | 2 | $8.50 \times 10^{-7}$ | $5.55 \times 10^{-7}$ | $1.15 \times 10^{-6}$ | $4.19 \times 10^{-7}$ |
|            |      | Pyr        | 2 | $7.99 \times 10^{-7}$ | $5.74 \times 10^{-7}$ | $1.02 \times 10^{-6}$ | $3.18 \times 10^{-7}$ |
|            |      | Total PAHs | 2 | $2.11 \times 10^{-6}$ | $1.22 \times 10^{-6}$ | $2.99 \times 10^{-6}$ | $1.25 \times 10^{-6}$ |
|            | SCA  | Flr        | 2 | $5.93 \times 10^{-7}$ | $5.10 \times 10^{-7}$ | $6.76 \times 10^{-7}$ | $1.17 \times 10^{-7}$ |
|            |      | Ant        | 4 | $1.19 \times 10^{-7}$ | $9.10 \times 10^{-8}$ | $1.97 \times 10^{-7}$ | $5.21 \times 10^{-8}$ |
|            |      | Flt        | 4 | $6.89 \times 10^{-7}$ | $4.61 \times 10^{-7}$ | $1.25 \times 10^{-6}$ | $3.73 \times 10^{-7}$ |
|            |      | Pyr        | 3 | $7.67 \times 10^{-7}$ | $5.36 \times 10^{-7}$ | $1.17 \times 10^{-6}$ | $3.52 \times 10^{-7}$ |
|            |      | B[a]P      | 1 | $5.17 \times 10^{-4}$ | $5.17 \times 10^{-4}$ | $5.17 \times 10^{-4}$ | -                     |
|            |      | Total PAHs | 4 | $1.31 \times 10^{-4}$ | $6.09 \times 10^{-7}$ | $5.19 \times 10^{-4}$ | $2.59 \times 10^{-4}$ |
|            | KKKL | Ace        | 3 | $2.10 \times 10^{-6}$ | $3.00 \times 10^{-7}$ | $4.11 \times 10^{-6}$ | $1.91 \times 10^{-6}$ |
|            |      | Flr        | 5 | $2.83 \times 10^{-6}$ | $3.50 \times 10^{-7}$ | $8.56 \times 10^{-6}$ | $3.56 \times 10^{-6}$ |
|            |      | Ant        | 4 | $5.52 \times 10^{-7}$ | $8.74 \times 10^{-8}$ | $1.35 \times 10^{-6}$ | $5.93 \times 10^{-7}$ |
|            |      | Flt        | 4 | $2.75 \times 10^{-6}$ | $4.53 \times 10^{-7}$ | $9.33 \times 10^{-6}$ | $4.38 \times 10^{-6}$ |
|            |      | Pyr        | 4 | $4.53 \times 10^{-6}$ | $5.20 \times 10^{-7}$ | $1.16 \times 10^{-5}$ | $5.16 \times 10^{-6}$ |
|            |      | B[a]P      | 3 | $5.21 \times 10^{-4}$ | $2.74 \times 10^{-4}$ | $7.47 \times 10^{-4}$ | $2.37 \times 10^{-4}$ |
|            |      | B[g]P      | 1 | $9.16 \times 10^{-6}$ | $9.16 \times 10^{-6}$ | $9.16 \times 10^{-6}$ | -                     |
|            |      | Total PAHs | 5 | $3.25 \times 10^{-4}$ | $9.27 \times 10^{-7}$ | $7.91 \times 10^{-4}$ | $3.47 \times 10^{-4}$ |
| Adolescent | DBKL | Flr        | 1 | $6.64 \times 10^{-7}$ | $6.64 \times 10^{-7}$ | $6.64 \times 10^{-7}$ | -                     |
|            |      | Ant        | 2 | $1.60 \times 10^{-7}$ | $1.03 \times 10^{-7}$ | $2.17 \times 10^{-7}$ | $8.07 \times 10^{-8}$ |

|       |      |            |   |                       |                       |                       |                       |
|-------|------|------------|---|-----------------------|-----------------------|-----------------------|-----------------------|
|       |      | Flt        | 2 | $9.14 \times 10^{-7}$ | $5.96 \times 10^{-7}$ | $1.23 \times 10^{-6}$ | $4.50 \times 10^{-7}$ |
|       |      | Pyr        | 2 | $8.58 \times 10^{-7}$ | $6.17 \times 10^{-7}$ | $1.10 \times 10^{-6}$ | $3.41 \times 10^{-7}$ |
|       |      | Total PAHs | 2 | $2.26 \times 10^{-6}$ | $1.32 \times 10^{-6}$ | $3.21 \times 10^{-6}$ | $1.34 \times 10^{-6}$ |
|       | SCA  | Flr        | 2 | $6.37 \times 10^{-7}$ | $5.48 \times 10^{-7}$ | $7.26 \times 10^{-7}$ | $1.26 \times 10^{-7}$ |
|       |      | Ant        | 4 | $1.28 \times 10^{-7}$ | $9.78 \times 10^{-8}$ | $2.12 \times 10^{-7}$ | $5.59 \times 10^{-8}$ |
|       |      | Flt        | 4 | $7.40 \times 10^{-7}$ | $4.95 \times 10^{-7}$ | $1.34 \times 10^{-6}$ | $4.00 \times 10^{-7}$ |
|       |      | Pyr        | 3 | $8.24 \times 10^{-7}$ | $5.76 \times 10^{-7}$ | $1.26 \times 10^{-6}$ | $3.78 \times 10^{-7}$ |
|       |      | B[a]P      | 1 | $5.56 \times 10^{-4}$ | $5.56 \times 10^{-4}$ | $5.56 \times 10^{-4}$ | -                     |
|       |      | Total PAHs | 4 | $1.41 \times 10^{-4}$ | $6.55 \times 10^{-7}$ | $5.57 \times 10^{-4}$ | $2.78 \times 10^{-4}$ |
|       | KKKL | Ace        | 3 | $2.25 \times 10^{-6}$ | $3.22 \times 10^{-7}$ | $4.41 \times 10^{-6}$ | $2.06 \times 10^{-6}$ |
|       |      | Flr        | 5 | $3.04 \times 10^{-6}$ | $3.75 \times 10^{-7}$ | $9.20 \times 10^{-6}$ | $3.82 \times 10^{-6}$ |
|       |      | Ant        | 4 | $5.93 \times 10^{-7}$ | $9.39 \times 10^{-8}$ | $1.45 \times 10^{-6}$ | $6.37 \times 10^{-7}$ |
|       |      | Flt        | 4 | $2.96 \times 10^{-6}$ | $4.87 \times 10^{-7}$ | $1.00 \times 10^{-5}$ | $4.71 \times 10^{-6}$ |
|       |      | Pyr        | 4 | $4.86 \times 10^{-6}$ | $5.58 \times 10^{-7}$ | $1.25 \times 10^{-5}$ | $5.55 \times 10^{-6}$ |
|       |      | B[a]P      | 3 | $5.60 \times 10^{-4}$ | $2.94 \times 10^{-4}$ | $8.02 \times 10^{-4}$ | $2.55 \times 10^{-4}$ |
|       |      | B[g]P      | 1 | $9.84 \times 10^{-6}$ | $9.84 \times 10^{-6}$ | $9.84 \times 10^{-6}$ | -                     |
|       |      | Total PAHs | 5 | $3.49 \times 10^{-4}$ | $9.96 \times 10^{-7}$ | $8.50 \times 10^{-4}$ | $3.73 \times 10^{-4}$ |
| Adult | DBKL | Flr        | 1 | $3.61 \times 10^{-7}$ | $3.61 \times 10^{-7}$ | $3.61 \times 10^{-7}$ | -                     |
|       |      | Ant        | 2 | $8.69 \times 10^{-8}$ | $5.59 \times 10^{-8}$ | $1.18 \times 10^{-7}$ | $4.38 \times 10^{-8}$ |
|       |      | Flt        | 2 | $4.96 \times 10^{-7}$ | $3.23 \times 10^{-7}$ | $6.69 \times 10^{-7}$ | $2.44 \times 10^{-7}$ |
|       |      | Pyr        | 2 | $4.66 \times 10^{-7}$ | $3.35 \times 10^{-7}$ | $5.97 \times 10^{-7}$ | $1.85 \times 10^{-7}$ |
|       |      | Total PAHs | 2 | $1.23 \times 10^{-6}$ | $7.14 \times 10^{-7}$ | $1.74 \times 10^{-6}$ | $7.28 \times 10^{-7}$ |
|       | SCA  | Flr        | 2 | $3.46 \times 10^{-7}$ | $2.97 \times 10^{-7}$ | $3.94 \times 10^{-7}$ | $6.84 \times 10^{-8}$ |
|       |      | Ant        | 4 | $6.96 \times 10^{-8}$ | $5.31 \times 10^{-8}$ | $1.15 \times 10^{-7}$ | $3.04 \times 10^{-8}$ |
|       |      | Flt        | 4 | $4.02 \times 10^{-7}$ | $2.69 \times 10^{-7}$ | $7.27 \times 10^{-7}$ | $2.17 \times 10^{-7}$ |
|       |      | Pyr        | 3 | $4.47 \times 10^{-7}$ | $3.13 \times 10^{-7}$ | $6.84 \times 10^{-7}$ | $2.05 \times 10^{-7}$ |
|       |      | B[a]P      | 1 | $3.02 \times 10^{-4}$ | $3.02 \times 10^{-4}$ | $3.02 \times 10^{-4}$ | -                     |
|       |      | Total PAHs | 4 | $7.64 \times 10^{-5}$ | $3.55 \times 10^{-7}$ | $3.03 \times 10^{-4}$ | $1.51 \times 10^{-4}$ |
|       | KKKL | Ace        | 3 | $1.22 \times 10^{-6}$ | $1.75 \times 10^{-7}$ | $2.40 \times 10^{-6}$ | $1.12 \times 10^{-6}$ |
|       |      | Flr        | 5 | $1.65 \times 10^{-6}$ | $2.04 \times 10^{-7}$ | $4.99 \times 10^{-6}$ | $2.07 \times 10^{-6}$ |
|       |      | Ant        | 4 | $3.22 \times 10^{-7}$ | $5.10 \times 10^{-8}$ | $7.90 \times 10^{-7}$ | $3.46 \times 10^{-7}$ |
|       |      | Flt        | 4 | $1.61 \times 10^{-6}$ | $2.64 \times 10^{-7}$ | $5.44 \times 10^{-6}$ | $2.56 \times 10^{-6}$ |
|       |      | Pyr        | 4 | $2.64 \times 10^{-6}$ | $3.03 \times 10^{-7}$ | $6.79 \times 10^{-6}$ | $3.01 \times 10^{-6}$ |
|       |      | B[a]P      | 3 | $3.04 \times 10^{-4}$ | $1.60 \times 10^{-4}$ | $4.35 \times 10^{-4}$ | $1.38 \times 10^{-4}$ |
|       |      | B[g]P      | 1 | $5.34 \times 10^{-6}$ | $5.34 \times 10^{-6}$ | $5.34 \times 10^{-6}$ | -                     |
|       |      | Total PAHs | 5 | $1.89 \times 10^{-4}$ | $5.41 \times 10^{-7}$ | $4.61 \times 10^{-4}$ | $2.02 \times 10^{-4}$ |

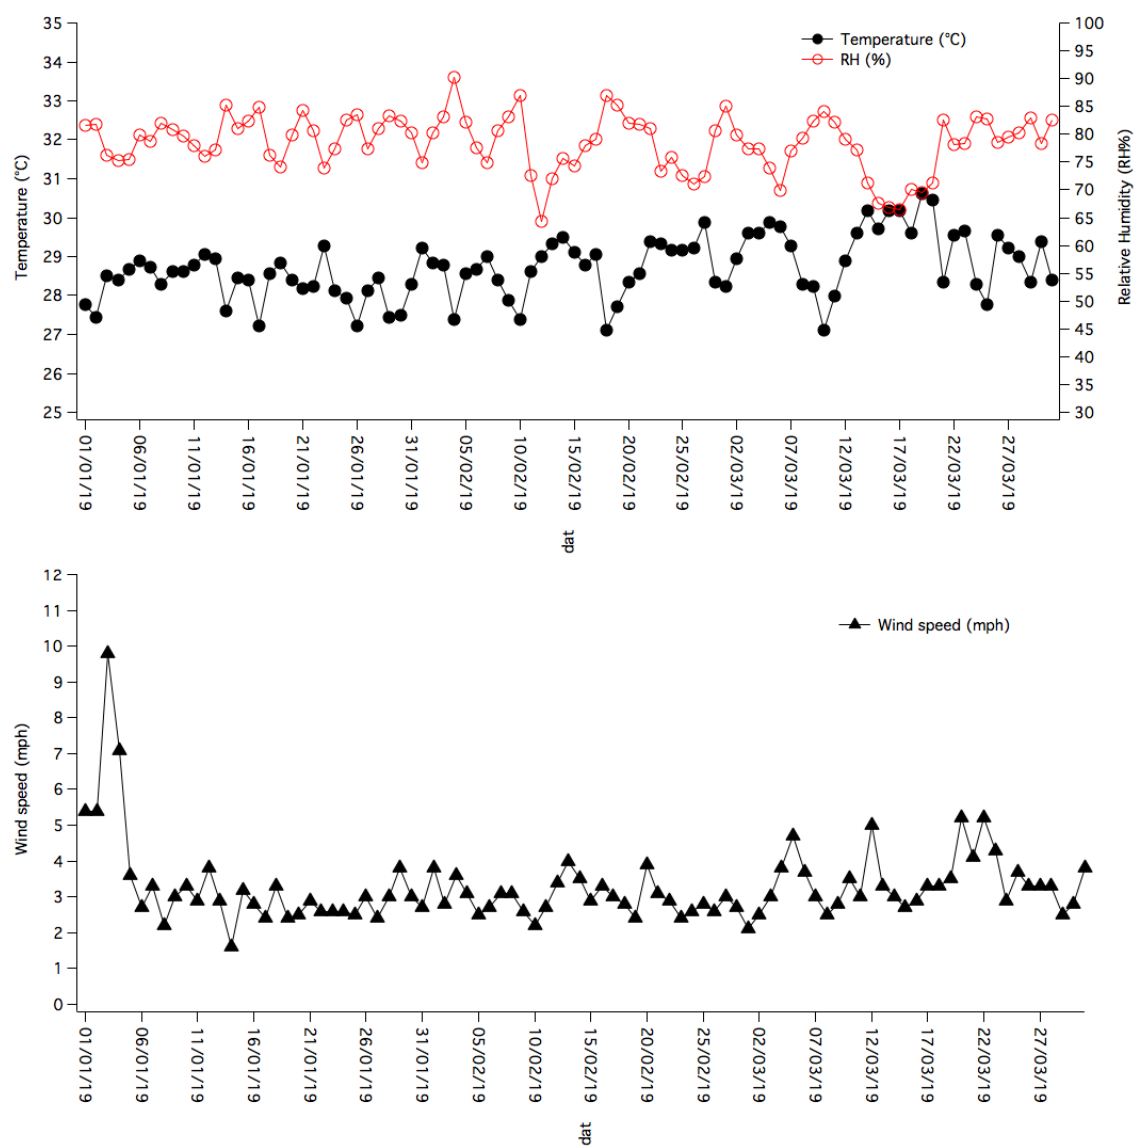

**Fig. S1:** Temperature (°C), relative humidity (RH%) and wind speed (mph) in January to March 2019

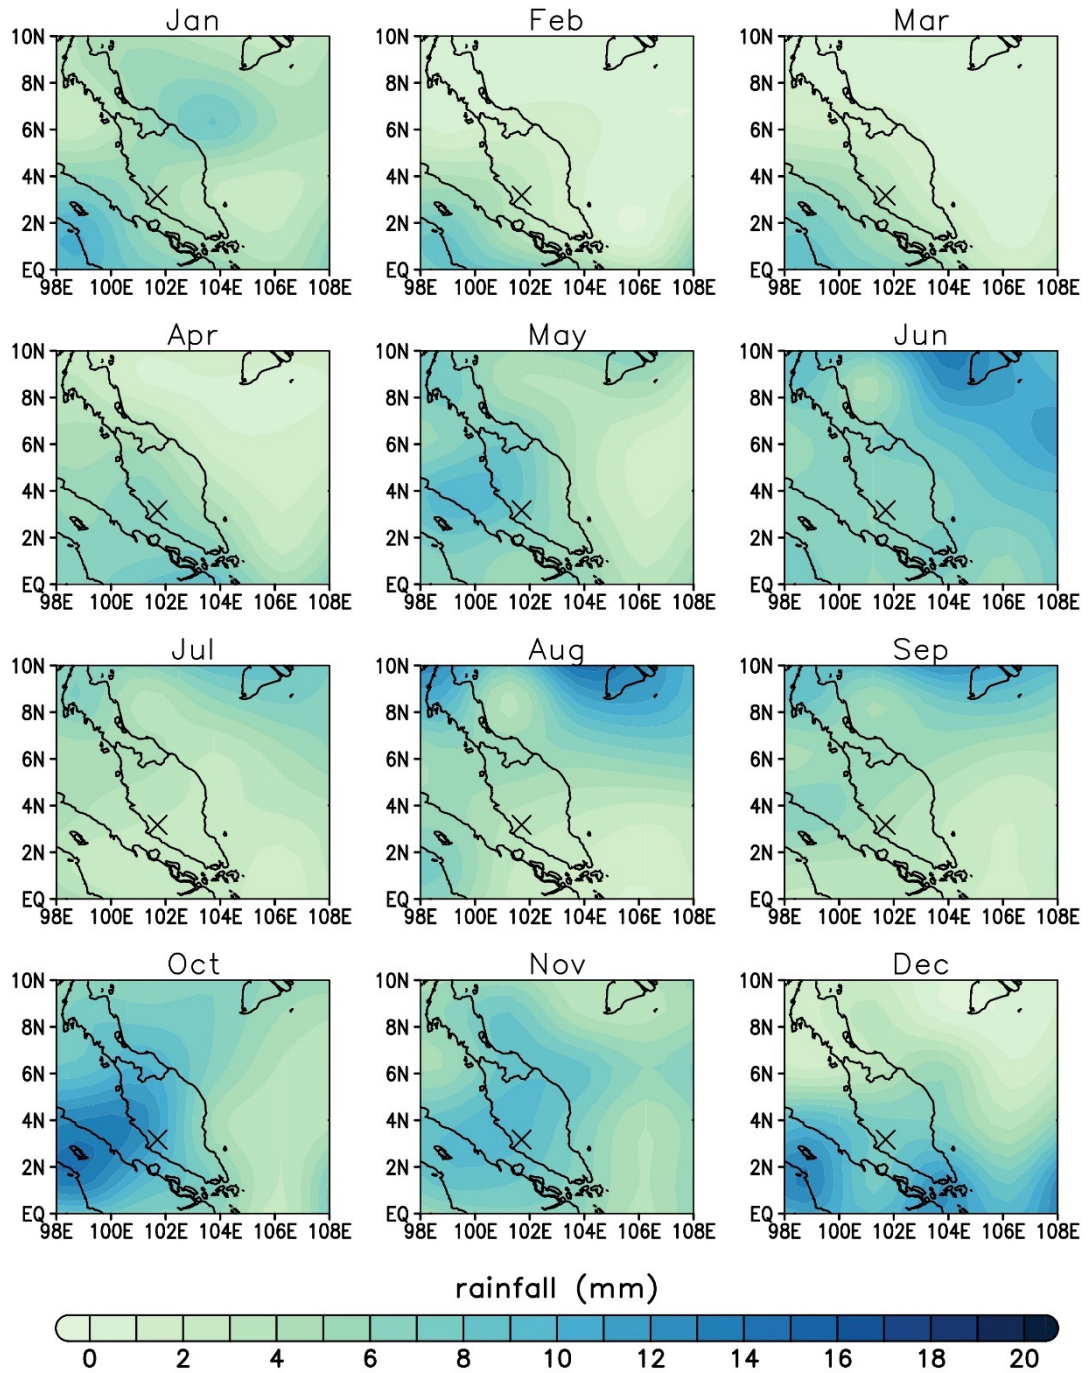

Fig. S2. Monthly change in rainfall over the study region in 2019. The mark (×) represents the study site.

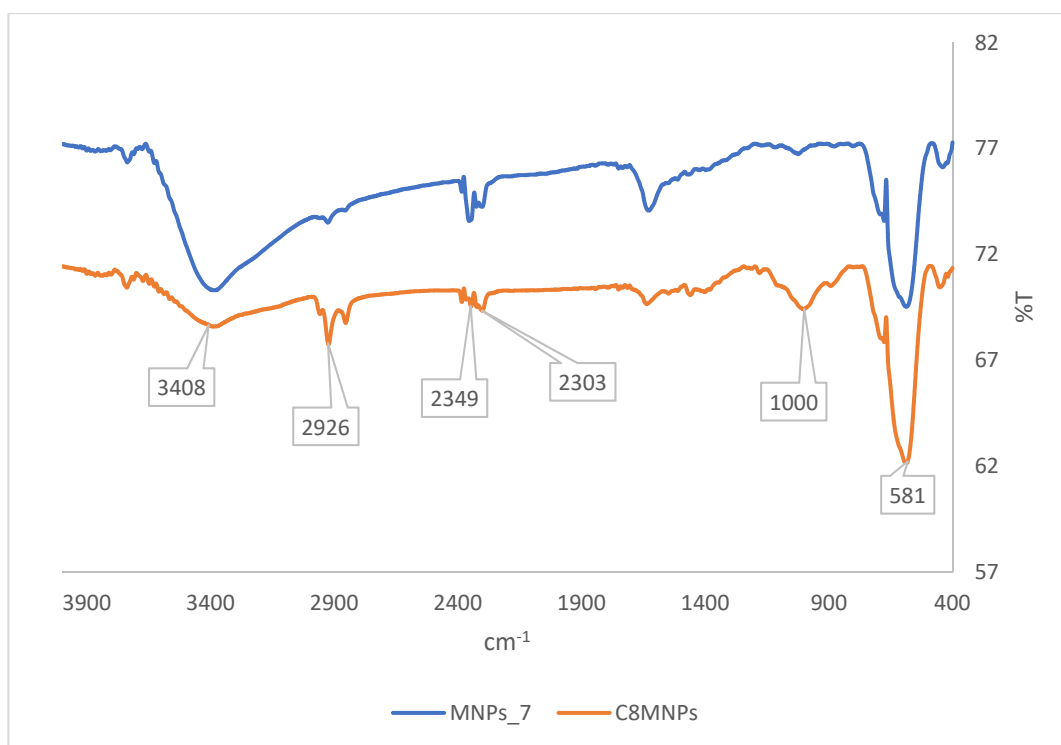

**Fig. S3:** FTIR spectra recorded between 4000 and 400  $\text{cm}^{-1}$  of MNPs and C8MNPs

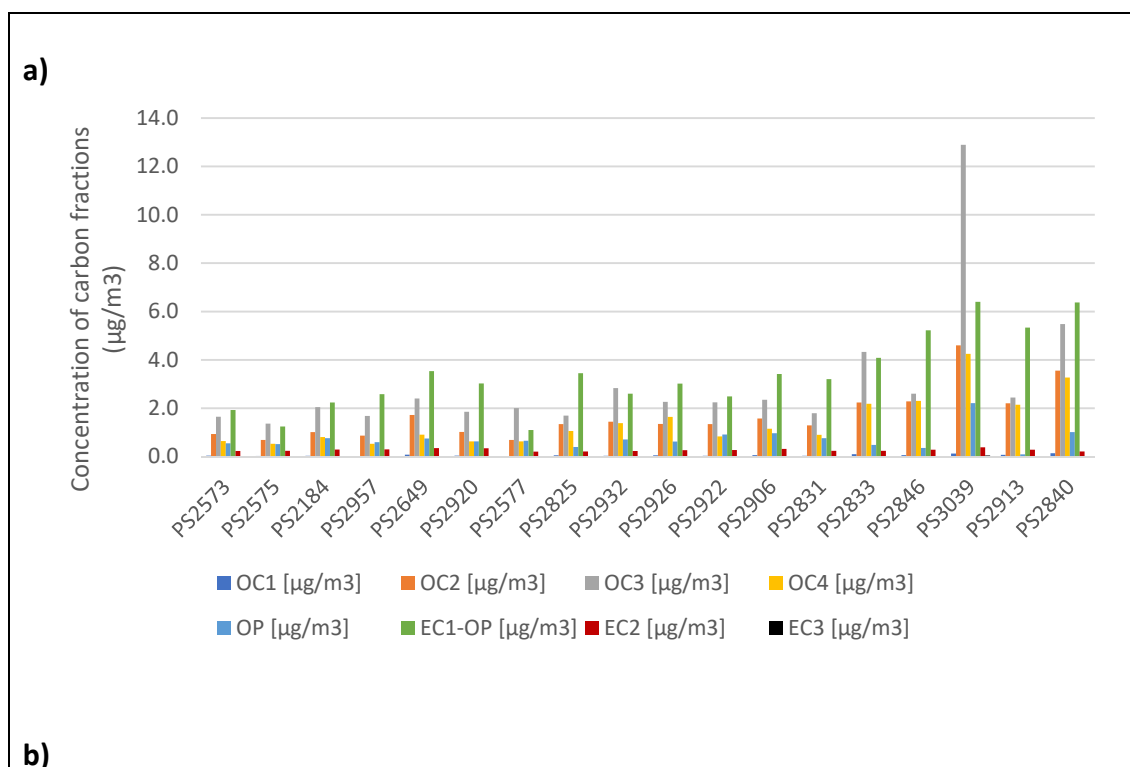

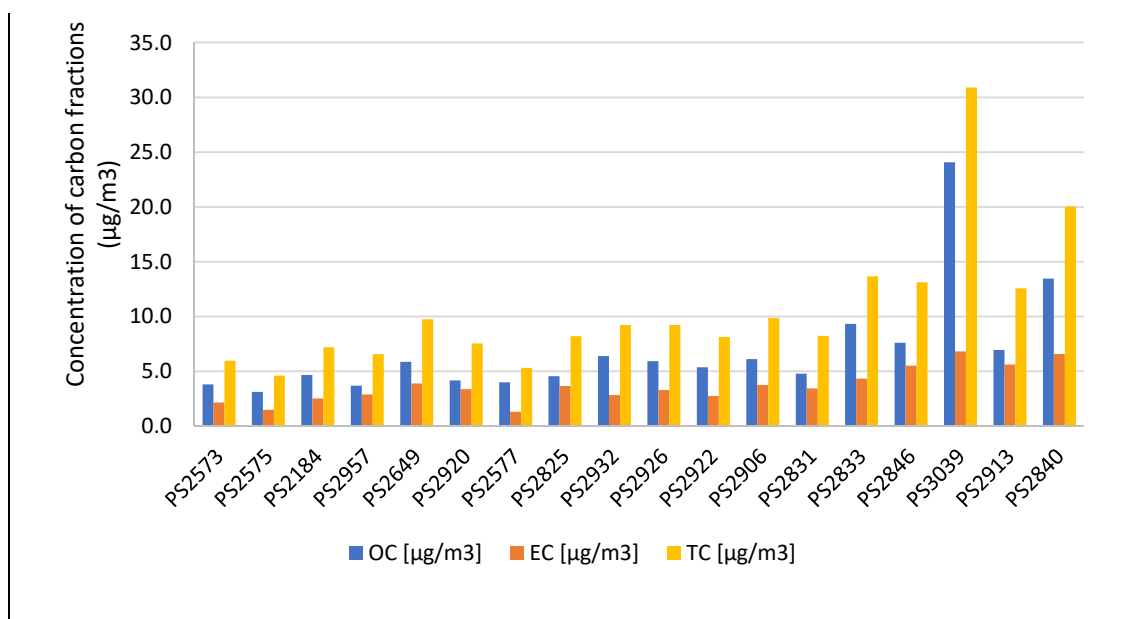

**Fig. S4** a) Concentration of OC<sub>1</sub>, OC<sub>2</sub>, OC<sub>3</sub>, OC<sub>4</sub>, OP, EC<sub>1</sub>-OP, EC<sub>2</sub> and EC<sub>3</sub>, b) Concentration of OC, EC and TC

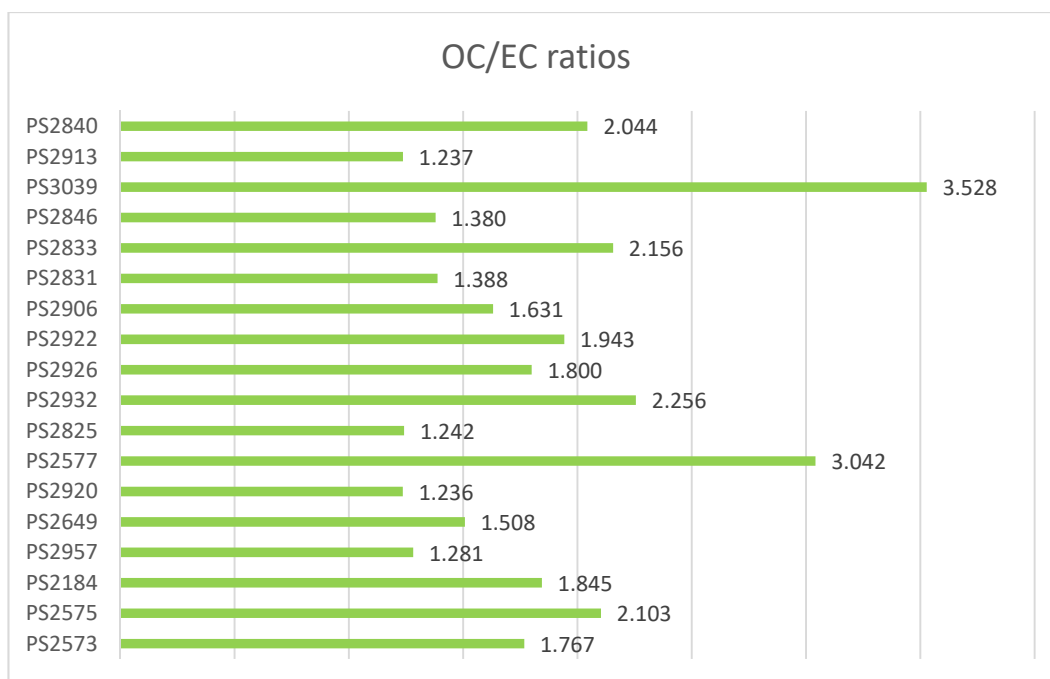

**Fig. S5:** OC to EC ratios for every filter samples.

1. Tay, K.S.; Rahman, N.A.; Abas, M.R.B. Magnetic nanoparticle assisted dispersive liquid-liquid microextraction for the determination of 4-n-nonylphenol in water. *Anal. Methods* **2013**, *5*, 2933-2938, doi:10.1039/C3AY00001J.
2. Yunker, M.B.; Macdonald, R.W.; Vingarzan, R.; Mitchell, R.H.; Goyette, D.; Sylvestre, S. PAHs in the Fraser River basin: a critical appraisal of PAH ratios as indicators of PAH source and composition. *Org. Geochem.* **2002**, *33*, 489-515, doi:10.1016/S0146-6380(02)00002-5.

3. Brändli, R.C.; Bucheli, T.D.; Ammann, S.; Desaulles, A.; Keller, A.; Blum, F.; Stahel, W.A. Critical evaluation of PAH source apportionment tools using data from the Swiss soil monitoring network. *J. Environ. Monit.* **2008**, *10*, 1278-1286, doi:10.1039/B807319H.
4. De La Torre-Roche, R.J.; Lee, W.Y.; Campos-Díaz, S.I. Soil-borne polycyclic aromatic hydrocarbons in El Paso, Texas: analysis of a potential problem in the United States/Mexico border region. *J. Hazard. Mater.* **2009**, *163*, 946-958, doi:10.1016/j.jhazmat.2008.07.089.
5. Manoli, E.; Kouras, A.; Samara, C. Profile analysis of ambient and source emitted particle-bound polycyclic aromatic hydrocarbons from three sites in northern Greece. *Chemosphere* **2004**, *56*, 867-878, doi:10.1016/j.chemosphere.2004.03.013.
6. Akyüz, M.; Çabuk, H. Gas-particle partitioning and seasonal variation of polycyclic aromatic hydrocarbons in the atmosphere of Zonguldak, Turkey. *Sci. Total Environ.* **2010**, *408*, 5550-5558, doi:<https://doi.org/10.1016/j.scitotenv.2010.07.063>.
7. EPA, U. Risk Assessment Guidance for Superfund: Volume I, Human Health Evaluation Manual (Part D, Standardized Planning, Reporting, and Review of Superfund Risk Assessments). *Journal Office of Emergency* **2001**, 20460.
8. Fujii, Y.; Mahmud, M.; Tohno, S.; Okuda, T.; Mizohata, A. A case study of PM<sub>2.5</sub> characterization in Bangi, Selangor, Malaysia during the Southwest monsoon season. *Aerosol and Air Quality Research* **2016**, *16*, 2685-2691, doi:<https://doi.org/10.4209/aaqr.2015.04.0277>.
9. Fujii, Y.; Tohno, S.; Amil, N.; Latif, M.; Oda, M.; Matsumoto, J.; Mizohata, A. Annual variations of carbonaceous PM<sub>2.5</sub> in Malaysia: Influence by Indonesian peatland fires. *Atmos. Chem. Phys.* **2015**, *15*, 13319-13329, doi:<https://doi.org/10.5194/acp-15-13319-2015>.
10. Suradi, H.; Khan, M.F.; Alias, N.F.; Mustapa Kama Shah, S.; Yusoff, S.; Fujii, Y.; Othman, M.; Latif, M.T. Influence of Tropical Weather and Northeasterly Air Mass on Carbonaceous Aerosol in the Southern Malay Peninsula. *ACS Earth and Space Chemistry* **2021**, *5*, 553-565, doi:<https://doi.org/10.1021/acsearthspacechem.0c00319>.
11. ChooChuay, C.; Pongpiachan, S.; Tipmanee, D.; Suttinun, O.; Deelaman, W.; Wang, Q.; Xing, L.; Li, G.; Han, Y.; Palakun, J. Impacts of PM<sub>2.5</sub> sources on variations in particulate chemical compounds in ambient air of Bangkok, Thailand. *Atmos. Pollut. Res.* **2020**.
12. Zhou, J.; Xing, Z.; Deng, J.; Du, K. Characterizing and sourcing ambient PM<sub>2.5</sub> over key emission regions in China I: Water-soluble ions and carbonaceous fractions. *Atmos. Environ.* **2016**, *135*, 20-30, doi:<https://doi.org/10.1016/j.atmosenv.2016.03.054>.
